# Supplementary material
Source: PubMed Central journal article supplement (PMC7543377)
Supplement: jjaa147_suppl_supplementary_material.pdf [file jjaa147_suppl_supplementary_material.pdf]

#1

COMPLETE

**Collector:** Email Invitation 1 (Email)  
**Started:** Monday, April 13, 2020 4:41:14 PM  
**Last Modified:** Monday, April 13, 2020 4:45:39 PM  
**Time Spent:** 00:04:25  
**Email:** vineet.aiims@gmail.com  
**IP Address:** 122.176.240.70

Page 1: IOIBD Survey following Webinar-4 dd 10 April 2020

**Q1 A. BACKGROUND QUESTIONS (before the coronavirus pandemic)1. In which country do you practice:**

India

**Q2 About your infusion centre:**

**The infusion centre is dedicated to patients with IBD**

**Q3 About staffing of your infusion centre (tick all that apply)Our infusion centre is organised as follows:**

**Staffed purely by general nurses to deliver infusions,  
 Has an attending physician at least 50% of operating hours**

**Q4 About the location of your infusion centre (tick all that apply):**

**Our infusion centre is attached to my practice / unit / hospital**

**Q5 5) How many infusions for IBD patients does your IBD centre prescribe each week**

**<10**

**Q6 What percentage of these infusions are "home infusions"**

**0%**

**Q7 In the infusion unit, which of the following are performed (tick all that apply)**

**Disease activity / adverse event assessment,  
 Routine blood tests,  
 Therapeutic drug levels.**

**Q8 Do you reduce the duration of infliximab infusions monitoring for patients who are stable on maintenance therapy**

**No: all infusions are 120 minutes**

**Q9 Do you reduce the post infusion monitoring for patient on stable maintenance therapy**

**Yes: post infusion monitoring is reduced**

**Q10 MODIFICATIONS INTRODUCED IN RESPONSE TO CORONAVIRUS PANDEMIC10) Have you moved the location of your infusion centre:**

**No: it remains attached to my centre / practice / hospital**

|                                                                                                                                                                                                     |                                                                                                                                                                                                                                  |
|-----------------------------------------------------------------------------------------------------------------------------------------------------------------------------------------------------|----------------------------------------------------------------------------------------------------------------------------------------------------------------------------------------------------------------------------------|
| <p><b>Q11</b> Has your infusion centre experienced a change its capacity:</p>                                                                                                                       | <p><b>Yes, the capacity for infusions has reduced</b></p>                                                                                                                                                                        |
| <p><b>Q12</b> Have you changed the case mix attending the infusion centre (tick all that apply):</p>                                                                                                | <p><b>No: it remains limited to IBD patients only</b></p>                                                                                                                                                                        |
| <p><b>Q13</b> Have you changed the staffing of the infusion centre:</p>                                                                                                                             | <p><b>No</b></p>                                                                                                                                                                                                                 |
| <p><b>Q14</b> Are patients called in advance of an infusion to screen them for coronavirus symptoms:</p>                                                                                            | <p><b>NO</b></p>                                                                                                                                                                                                                 |
| <p><b>Q15</b> Are patients screened on arrival at the infusion centre for fever / symptoms of coronavirus:</p>                                                                                      | <p><b>YES</b></p>                                                                                                                                                                                                                |
| <p><b>Q16</b> How many patients have a positive screen and require their infusion to be rescheduled:<br/>nil</p>                                                                                    |                                                                                                                                                                                                                                  |
| <p><b>Q17</b> If someone has a fever or “influenza like illness” on screening how long are you delaying their infusions for<br/>1 week or till the RT pcr comes negatives and there is no fever</p> |                                                                                                                                                                                                                                  |
| <p><b>Q18</b> What other modifications have you implemented (tick all that apply):</p>                                                                                                              | <p><b>Increased cleaning in between infusions,<br/>Reduced number of patients attending to allow social distancing<br/>,<br/>Increased the duration between infusions in response to coronavirus (ie from 8 to 10 weeks)</b></p> |
| <p><b>Q19</b> What modifications to patient assessment have you made (tick all that apply)</p>                                                                                                      | <p><b>Routine bloods tests are not taken,<br/>Drug levels are not taken</b></p>                                                                                                                                                  |
| <p><b>Q20</b> Have you modified the infusion protocols (tick all that apply)</p>                                                                                                                    | <p><b>No – the protocols remain the same</b></p>                                                                                                                                                                                 |
| <p><b>Q21</b> How many patients have cancelled / delayed their infusion due to concern about attending and the risk of coronavirus?</p>                                                             | <p><b>11-20%</b></p>                                                                                                                                                                                                             |
| <p><b>Q22</b> If patients have delayed / cancelled their infusions – have any had disease flare</p>                                                                                                 | <p><b>No: all have remained well</b></p>                                                                                                                                                                                         |

**Q23** How many patients that receive biologic infusions for IBD at your centre have tested positive for coronavirus

Nil

---

**Q24** What sources of information support are there for your patients

**We have always had a telephone help line / email address**

---

**Q25** Please list any other modifications you have made to your infusion centre in the text box below

**Respondent skipped this question**

---

## #2

**COMPLETE**

**Collector:** Email Invitation 1 (Email)  
**Started:** Monday, April 13, 2020 4:47:44 PM  
**Last Modified:** Monday, April 13, 2020 4:54:54 PM  
**Time Spent:** 00:07:10  
**Email:** gassull.ma@gmail.com  
**IP Address:** 88.5.1.182

Page 1: IOIBD Survey following Webinar-4 dd 10 April 2020

**Q1 A. BACKGROUND QUESTIONS (before the coronavirus pandemic)1. In which country do you practice:**

Spain

**Q2 About your infusion centre:** **The infusion centre accepts patients from different specialities**

**Q3 About staffing of your infusion centre (tick all that apply)Our infusion centre is organised as follows:** **Staffed purely by general nurses to deliver infusions**

**Q4 About the location of your infusion centre (tick all that apply):** **Our infusion centre is attached to my practice / unit / hospital**

**Q5 5) How many infusions for IBD patients does your IBD centre prescribe each week** **10-50**

**Q6 What percentage of these infusions are "home infusions"** **0%**

**Q7 In the infusion unit, which of the following are performed (tick all that apply)** **Routine blood tests,  
Therapeutic drug levels.**

**Q8 Do you reduce the duration of infliximab infusions monitoring for patients who are stable on maintenance therapy** **No: all infusions are 120 minutes**

**Q9 Do you reduce the post infusion monitoring for patient on stable maintenance therapy** **No all patients are monitored for standard time after an infusion**

**Q10 MODIFICATIONS INTRODUCED IN RESPONSE TO CORONAVIRUS PANDEMIC10) Have you moved the location of your infusion centre:** **No: it remains attached to my centre / practice / hospital**

|                                                                                                                                         |                                                                                                                                                         |
|-----------------------------------------------------------------------------------------------------------------------------------------|---------------------------------------------------------------------------------------------------------------------------------------------------------|
| <b>Q11</b> Has your infusion centre experienced a change its capacity:                                                                  | <b>Yes, the capacity for infusions has reduced</b>                                                                                                      |
| <b>Q12</b> Have you changed the case mix attending the infusion centre (tick all that apply):                                           | <b>No: it has always received patients from different specialities</b>                                                                                  |
| <b>Q13</b> Have you changed the staffing of the infusion centre:                                                                        | <b>No</b>                                                                                                                                               |
| <b>Q14</b> Are patients called in advance of an infusion to screen them for coronavirus symptoms:                                       | <b>YES</b>                                                                                                                                              |
| <b>Q15</b> Are patients screened on arrival at the infusion centre for fever / symptoms of coronavirus:                                 | <b>YES</b>                                                                                                                                              |
| <b>Q16</b> How many patients have a positive screen and require their infusion to be rescheduled:<br>Zero so far                        |                                                                                                                                                         |
| <b>Q17</b> If someone has a fever or “influenza like illness” on screening how long are you delaying their infusions for<br>two weeks   |                                                                                                                                                         |
| <b>Q18</b> What other modifications have you implemented (tick all that apply):                                                         | <b>Increased spacing between infusion chairs,<br/>Increased cleaning in between infusions,<br/>Increased in hours of operation to maintain capacity</b> |
| <b>Q19</b> What modifications to patient assessment have you made (tick all that apply)                                                 | <b>Drug levels are not taken</b>                                                                                                                        |
| <b>Q20</b> Have you modified the infusion protocols (tick all that apply)                                                               | <b>No – the protocols remain the same</b>                                                                                                               |
| <b>Q21</b> How many patients have cancelled / delayed their infusion due to concern about attending and the risk of coronavirus?        | <b>6-10%</b>                                                                                                                                            |
| <b>Q22</b> If patients have delayed / cancelled their infusions – have any had disease flare                                            | <b>No: all have remained well</b>                                                                                                                       |
| <b>Q23</b> How many patients that receive biologic infusions for IBD at your centre have tested positive for coronavirus<br>zero so far |                                                                                                                                                         |

**Q24** What sources of information support are there for your patients

**We have always had a telephone help line / email address**

,

**We have produced a patient information sheet in response to coronavirus**

---

**Q25** Please list any other modifications you have made to your infusion centre in the text box below

**Respondent skipped this question**

---

#3

COMPLETE

**Collector:** Email Invitation 1 (Email)  
**Started:** Monday, April 13, 2020 5:08:06 PM  
**Last Modified:** Monday, April 13, 2020 5:14:26 PM  
**Time Spent:** 00:06:19  
**Email:** jpanes@clinic.cat  
**IP Address:** 88.10.103.241

Page 1: IOIBD Survey following Webinar-4 dd 10 April 2020

**Q1 A. BACKGROUND QUESTIONS (before the coronavirus pandemic)1. In which country do you practice:**

Spain

**Q2 About your infusion centre:**

**The infusion centre accepts patients from different specialities**

**Q3 About staffing of your infusion centre (tick all that apply)Our infusion centre is organised as follows:**

**Has IBD specialist nurse input, but infusions given by general nurses**

**Q4 About the location of your infusion centre (tick all that apply):**

**Our infusion centre is attached to my practice / unit / hospital**

**Q5 5) How many infusions for IBD patients does your IBD centre prescribe each week**

**10-50**

**Q6 What percentage of these infusions are "home infusions"**

**0%**

**Q7 In the infusion unit, which of the following are performed (tick all that apply)**

**Disease activity / adverse event assessment,  
 Routine blood tests,  
 Therapeutic drug levels.**

**Q8 Do you reduce the duration of infliximab infusions monitoring for patients who are stable on maintenance therapy**

**Yes: reduce infusion to 60 minutes**

**Q9 Do you reduce the post infusion monitoring for patient on stable maintenance therapy**

**Yes: post infusion monitoring is reduced**

**Q10 MODIFICATIONS INTRODUCED IN RESPONSE TO CORONAVIRUS PANDEMIC10) Have you moved the location of your infusion centre:**

**No: it remains attached to my centre / practice / hospital**

|                                                                                                                                         |                                                                        |
|-----------------------------------------------------------------------------------------------------------------------------------------|------------------------------------------------------------------------|
| <b>Q11</b> Has your infusion centre experienced a change its capacity:                                                                  | <b>No, the capacity of infusions has remained the same</b>             |
| <b>Q12</b> Have you changed the case mix attending the infusion centre (tick all that apply):                                           | <b>No: it has always received patients from different specialities</b> |
| <b>Q13</b> Have you changed the staffing of the infusion centre:                                                                        | <b>No</b>                                                              |
| <b>Q14</b> Are patients called in advance of an infusion to screen them for coronavirus symptoms:                                       | <b>NO</b>                                                              |
| <b>Q15</b> Are patients screened on arrival at the infusion centre for fever / symptoms of coronavirus:                                 | <b>YES</b>                                                             |
| <b>Q16</b> How many patients have a positive screen and require their infusion to be rescheduled:<br><br>1%                             |                                                                        |
| <b>Q17</b> If someone has a fever or “influenza like illness” on screening how long are you delaying their infusions for<br><br>2 weeks |                                                                        |
| <b>Q18</b> What other modifications have you implemented (tick all that apply):                                                         | <b>Increased cleaning in between infusions</b>                         |
| <b>Q19</b> What modifications to patient assessment have you made (tick all that apply)                                                 | <b>Respondent skipped this question</b>                                |
| <b>Q20</b> Have you modified the infusion protocols (tick all that apply)                                                               | <b>No – the protocols remain the same</b>                              |
| <b>Q21</b> How many patients have cancelled / delayed their infusion due to concern about attending and the risk of coronavirus?        | <b>&lt;5%</b>                                                          |
| <b>Q22</b> If patients have delayed / cancelled their infusions – have any had disease flare                                            | <b>Yes: they had infusion and responded</b>                            |
| <b>Q23</b> How many patients that receive biologic infusions for IBD at your centre have tested positive for coronavirus<br><br>0%      |                                                                        |
| <b>Q24</b> What sources of information support are there for your patients                                                              | <b>We have always had a telephone help line / email address</b>        |



**Q25** Please list any other modifications you have made to your infusion centre in the text box below

Inform patients by e-mail that treatments should be continued

---

## #4

COMPLETE

**Collector:** Email Invitation 1 (Email)  
**Started:** Monday, April 13, 2020 5:40:04 PM  
**Last Modified:** Monday, April 13, 2020 5:43:11 PM  
**Time Spent:** 00:03:07  
**Email:** siewchienng@cuhk.edu.hk  
**IP Address:** 168.70.35.163

Page 1: IOIBD Survey following Webinar-4 dd 10 April 2020

**Q1 A. BACKGROUND QUESTIONS (before the coronavirus pandemic)**1. In which country do you practice:

Hong Kong

**Q2** About your infusion centre:

**The infusion centre accepts patients from different specialities**

**Q3** About staffing of your infusion centre (tick all that apply)Our infusion centre is organised as follows:

**Has an attending physician at least 50% of operating hours**

**Q4** About the location of your infusion centre (tick all that apply):

**Our infusion centre is attached to my practice / unit / hospital**

**Q5** 5) How many infusions for IBD patients does your IBD centre prescribe each week

**10-50**

**Q6** What percentage of these infusions are "home infusions"

**0%**

**Q7** In the infusion unit, which of the following are performed (tick all that apply)

**Disease activity / adverse event assessment,  
Routine blood tests**

**Q8** Do you reduce the duration of infliximab infusions monitoring for patients who are stable on maintenance therapy

**Yes: reduce infusion to 60 minutes**

**Q9** Do you reduce the post infusion monitoring for patient on stable maintenance therapy

**Yes: post infusion monitoring is reduced**

**Q10 MODIFICATIONS INTRODUCED IN RESPONSE TO CORONAVIRUS PANDEMIC**10) Have you moved the location of your infusion centre:

**No: it remains attached to my centre / practice / hospital**

|                                                                                                                                         |                                                                                                                                                                                    |
|-----------------------------------------------------------------------------------------------------------------------------------------|------------------------------------------------------------------------------------------------------------------------------------------------------------------------------------|
| <b>Q11</b> Has your infusion centre experienced a change its capacity:                                                                  | <b>No, the capacity of infusions has remained the same</b>                                                                                                                         |
| <b>Q12</b> Have you changed the case mix attending the infusion centre (tick all that apply):                                           | <b>No: it has always received patients from different specialities</b>                                                                                                             |
| <b>Q13</b> Have you changed the staffing of the infusion centre:                                                                        | <b>No</b>                                                                                                                                                                          |
| <b>Q14</b> Are patients called in advance of an infusion to screen them for coronavirus symptoms:                                       | <b>NO</b>                                                                                                                                                                          |
| <b>Q15</b> Are patients screened on arrival at the infusion centre for fever / symptoms of coronavirus:                                 | <b>YES</b>                                                                                                                                                                         |
| <b>Q16</b> How many patients have a positive screen and require their infusion to be rescheduled:<br><br>0                              |                                                                                                                                                                                    |
| <b>Q17</b> If someone has a fever or “influenza like illness” on screening how long are you delaying their infusions for<br><br>2 weeks |                                                                                                                                                                                    |
| <b>Q18</b> What other modifications have you implemented (tick all that apply):                                                         | <b>Increased cleaning in between infusions,<br/>Reduced number of patients attending to allow social distancing<br/>,<br/>Increased in hours of operation to maintain capacity</b> |
| <b>Q19</b> What modifications to patient assessment have you made (tick all that apply)                                                 | <b>Disease activity assessment / adverse events are not recorded</b>                                                                                                               |
| <b>Q20</b> Have you modified the infusion protocols (tick all that apply)                                                               | <b>No – the protocols remain the same</b>                                                                                                                                          |
| <b>Q21</b> How many patients have cancelled / delayed their infusion due to concern about attending and the risk of coronavirus?        | <b>&lt;5%</b>                                                                                                                                                                      |
| <b>Q22</b> If patients have delayed / cancelled their infusions – have any had disease flare                                            | <b>No: all have remained well</b>                                                                                                                                                  |
| <b>Q23</b> How many patients that receive biologic infusions for IBD at your centre have tested positive for coronavirus<br><br>0       |                                                                                                                                                                                    |

**Q24** What sources of information support are there for your patients

**We have always had a telephone help line / email address**

---

**Q25** Please list any other modifications you have made to your infusion centre in the text box below

**Respondent skipped this question**

---

#5

**COMPLETE**

**Collector:** Email Invitation 1 (Email)  
**Started:** Monday, April 13, 2020 6:43:53 PM  
**Last Modified:** Monday, April 13, 2020 6:47:46 PM  
**Time Spent:** 00:03:53  
**Email:** britta.siegmund@charite.de  
**IP Address:** 62.153.23.186

Page 1: IOIBD Survey following Webinar-4 dd 10 April 2020

**Q1 A. BACKGROUND QUESTIONS (before the coronavirus pandemic)1. In which country do you practice:**

Germany

**Q2 About your infusion centre:**

**The infusion centre is dedicated to patients with IBD**

**Q3 About staffing of your infusion centre (tick all that apply)Our infusion centre is organised as follows:**

**Has IBD specialist nurse input, but infusions given by general nurses**

,

**Has an attending physician at least 50% of operating hours**

**Q4 About the location of your infusion centre (tick all that apply):**

**Our infusion centre is attached to my practice / unit / hospital**

**Q5 5) How many infusions for IBD patients does your IBD centre prescribe each week**

**50-100**

**Q6 What percentage of these infusions are "home infusions"**

**0%**

**Q7 In the infusion unit, which of the following are performed (tick all that apply)**

**Disease activity / adverse event assessment,  
 Routine blood tests,  
 Therapeutic drug levels.**

**Q8 Do you reduce the duration of infliximab infusions monitoring for patients who are stable on maintenance therapy**

**Yes: reduce infusion to 60 minutes**

**Q9 Do you reduce the post infusion monitoring for patient on stable maintenance therapy**

**No all patients are monitored for standard time after an infusion**

|                                                                                                                                                  |                                                                                                                                                                                                                                                                                                                                         |
|--------------------------------------------------------------------------------------------------------------------------------------------------|-----------------------------------------------------------------------------------------------------------------------------------------------------------------------------------------------------------------------------------------------------------------------------------------------------------------------------------------|
| <p><b>Q10</b> MODIFICATIONS INTRODUCED IN RESPONSE TO CORONAVIRUS PANDEMIC10) Have you moved the location of your infusion centre:</p>           | <p><b>No: it remains attached to my centre / practice / hospital</b></p>                                                                                                                                                                                                                                                                |
| <p><b>Q11</b> Has your infusion centre experienced a change its capacity:</p>                                                                    | <p><b>No, the capacity of infusions has remained the same</b></p>                                                                                                                                                                                                                                                                       |
| <p><b>Q12</b> Have you changed the case mix attending the infusion centre (tick all that apply):</p>                                             | <p><b>No: it remains limited to IBD patients only</b></p>                                                                                                                                                                                                                                                                               |
| <p><b>Q13</b> Have you changed the staffing of the infusion centre:</p>                                                                          | <p><b>No</b></p>                                                                                                                                                                                                                                                                                                                        |
| <p><b>Q14</b> Are patients called in advance of an infusion to screen them for coronavirus symptoms:</p>                                         | <p><b>YES</b></p>                                                                                                                                                                                                                                                                                                                       |
| <p><b>Q15</b> Are patients screened on arrival at the infusion centre for fever / symptoms of coronavirus:</p>                                   | <p><b>YES</b></p>                                                                                                                                                                                                                                                                                                                       |
| <p><b>Q16</b> How many patients have a positive screen and require their infusion to be rescheduled:<br/><br/>few</p>                            |                                                                                                                                                                                                                                                                                                                                         |
| <p><b>Q17</b> If someone has a fever or “influenza like illness” on screening how long are you delaying their infusions for<br/><br/>14 days</p> |                                                                                                                                                                                                                                                                                                                                         |
| <p><b>Q18</b> What other modifications have you implemented (tick all that apply):</p>                                                           | <p><b>Increased spacing between infusion chairs,</b><br/><b>Reduced number of patients attending to allow social distancing</b><br/>,<br/><b>Increased the duration between infusions in response to coronavirus (ie from 8 to 10 weeks)</b><br/>,<br/><b>Altered the threshold for IV iron infusions to reduce patient numbers</b></p> |
| <p><b>Q19</b> What modifications to patient assessment have you made (tick all that apply)</p>                                                   | <p><b>Respondent skipped this question</b></p>                                                                                                                                                                                                                                                                                          |
| <p><b>Q20</b> Have you modified the infusion protocols (tick all that apply)</p>                                                                 | <p><b>No – the protocols remain the same</b></p>                                                                                                                                                                                                                                                                                        |
| <p><b>Q21</b> How many patients have cancelled / delayed their infusion due to concern about attending and the risk of coronavirus?</p>          | <p><b>20-50%</b></p>                                                                                                                                                                                                                                                                                                                    |

**Q22** If patients have delayed / cancelled their infusions – have any had disease flare **No: all have remained well**

---

**Q23** How many patients that receive biologic infusions for IBD at your centre have tested positive for coronavirus

1

---

**Q24** What sources of information support are there for your patients

**We have always had a telephone help line / email address**

,

**We have produced a patient information sheet in response to coronavirus**

---

**Q25** Please list any other modifications you have made to your infusion centre in the text box below

**Respondent skipped this question**

---

# #6

**COMPLETE**

**Collector:** Email Invitation 1 (Email)  
**Started:** Monday, April 13, 2020 8:23:29 PM  
**Last Modified:** Monday, April 13, 2020 8:33:10 PM  
**Time Spent:** 00:09:40  
**Email:** gjmantzaris@gmail.com  
**IP Address:** 94.64.188.47

Page 1: IOIBD Survey following Webinar-4 dd 10 April 2020

**Q1 A. BACKGROUND QUESTIONS (before the coronavirus pandemic)1. In which country do you practice:**

Greece

**Q2 About your infusion centre:** **The infusion centre is dedicated to patients with IBD**

**Q3 About staffing of your infusion centre (tick all that apply)Our infusion centre is organised as follows:** **Staffed purely by general nurses to deliver infusions, Has an attending physician at least 50% of operating hours**

**Q4 About the location of your infusion centre (tick all that apply):** **Our infusion centre is attached to my practice / unit / hospital**

**Q5 5) How many infusions for IBD patients does your IBD centre prescribe each week** **50-100**

**Q6 What percentage of these infusions are "home infusions"** **0%**

**Q7 In the infusion unit, which of the following are performed (tick all that apply)** **Disease activity / adverse event assessment, Routine blood tests, Therapeutic drug levels.**

**Q8 Do you reduce the duration of infliximab infusions monitoring for patients who are stable on maintenance therapy** **Yes: reduce infusion to 60 minutes**

**Q9 Do you reduce the post infusion monitoring for patient on stable maintenance therapy** **Yes: post infusion monitoring is reduced**

**Q10 MODIFICATIONS INTRODUCED IN RESPONSE TO CORONAVIRUS PANDEMIC10) Have you moved the location of your infusion centre:** **Yes: it has moved to a new location out of the medical centre in response to coronavirus**



**Q11** Has your infusion centre experienced a change its capacity: **No, the capacity of infusions has remained the same**

---

**Q12** Have you changed the case mix attending the infusion centre (tick all that apply): **No: it remains limited to IBD patients only**

---

**Q13** Have you changed the staffing of the infusion centre: **No**

---

**Q14** Are patients called in advance of an infusion to screen them for coronavirus symptoms: **YES**

---

**Q15** Are patients screened on arrival at the infusion centre for fever / symptoms of coronavirus: **YES**

---

**Q16** How many patients have a positive screen and require their infusion to be rescheduled:

None

---

**Q17** If someone has a fever or "influenza like illness" on screening how long are you delaying their infusions for

Until I get a RT-PCR result negative for SARS-COV-2 plus 7 days after apyrexia

---

**Q18** What other modifications have you implemented (tick all that apply):

- Increased spacing between infusion chairs,**
- Increased cleaning in between infusions,**
- Increased in hours of operation to maintain capacity,**
- Switching patients on infusions to subcutaneous alternatives**
- ,
- Altered the threshold for IV iron infusions to reduce patient numbers**
- ,
- OTHER::
- Administrative work is exclusively performed by Physicians and Nurses without any patient involvement

---

**Q19** What modifications to patient assessment have you made (tick all that apply) **Routine bloods tests are not taken**

---

**Q20** Have you modified the infusion protocols (tick all that apply)

**We have reduced infusion duration for stable patients,**  
**We have reduced infusion duration for all patients,**  
**We have reduced monitoring post infusion for all patients**  
,  
**We have switched iv premedication to oral where possible**

**Q21** How many patients have cancelled / delayed their infusion due to concern about attending and the risk of coronavirus?

**<5%**

**Q22** If patients have delayed / cancelled their infusions – have any had disease flare

**No: all have remained well**

**Q23** How many patients that receive biologic infusions for IBD at your centre have tested positive for coronavirus

None

**Q24** What sources of information support are there for your patients

**We have set up a telephone help line / email address in response to coronavirus**  
,  
**We have produced a patient information sheet in response to coronavirus**

**Q25** Please list any other modifications you have made to your infusion centre in the text box below

Patients receive electronic prescriptions of additional medicines and for blood tests

#7

**COMPLETE**

**Collector:** Email Invitation 1 (Email)  
**Started:** Monday, April 13, 2020 8:28:58 PM  
**Last Modified:** Monday, April 13, 2020 8:35:17 PM  
**Time Spent:** 00:06:19  
**Email:** ikoutroubakis@gmail.com  
**IP Address:** 2.87.160.123

Page 1: IOIBD Survey following Webinar-4 dd 10 April 2020

**Q1 A. BACKGROUND QUESTIONS (before the coronavirus pandemic)1. In which country do you practice:**

Greece

**Q2 About your infusion centre:** **The infusion centre is dedicated to patients with IBD**

**Q3 About staffing of your infusion centre (tick all that apply)Our infusion centre is organised as follows:** **Staffed purely by general nurses to deliver infusions**

**Q4 About the location of your infusion centre (tick all that apply):** **Our infusion centre is attached to my practice / unit / hospital**

**Q5 5) How many infusions for IBD patients does your IBD centre prescribe each week** **10-50**

**Q6 What percentage of these infusions are "home infusions"** **0%**

**Q7 In the infusion unit, which of the following are performed (tick all that apply)** **Disease activity / adverse event assessment, Routine blood tests**

**Q8 Do you reduce the duration of infliximab infusions monitoring for patients who are stable on maintenance therapy** **Yes: reduce infusion to 60 minutes**

**Q9 Do you reduce the post infusion monitoring for patient on stable maintenance therapy** **Yes: post infusion monitoring is reduced**

**Q10 MODIFICATIONS INTRODUCED IN RESPONSE TO CORONAVIRUS PANDEMIC10) Have you moved the location of your infusion centre:** **No: it remains attached to my centre / practice / hospital**

|                                                                                                                                    |                                                                                                                     |
|------------------------------------------------------------------------------------------------------------------------------------|---------------------------------------------------------------------------------------------------------------------|
| <b>Q11</b> Has your infusion centre experienced a change its capacity:                                                             | <b>No, the capacity of infusions has remained the same</b>                                                          |
| <b>Q12</b> Have you changed the case mix attending the infusion centre (tick all that apply):                                      | <b>No: it remains limited to IBD patients only</b>                                                                  |
| <b>Q13</b> Have you changed the staffing of the infusion centre:                                                                   | <b>No</b>                                                                                                           |
| <b>Q14</b> Are patients called in advance of an infusion to screen them for coronavirus symptoms:                                  | <b>NO</b>                                                                                                           |
| <b>Q15</b> Are patients screened on arrival at the infusion centre for fever / symptoms of coronavirus:                            | <b>YES</b>                                                                                                          |
| <b>Q16</b> How many patients have a positive screen and require their infusion to be rescheduled:<br>10%                           |                                                                                                                     |
| <b>Q17</b> If someone has a fever or "influenza like illness" on screening how long are you delaying their infusions for<br>7 days |                                                                                                                     |
| <b>Q18</b> What other modifications have you implemented (tick all that apply):                                                    | <b>Increased cleaning in between infusions,<br/>Reduced number of patients attending to allow social distancing</b> |
| <b>Q19</b> What modifications to patient assessment have you made (tick all that apply)                                            | <b>Drug levels are not taken</b>                                                                                    |
| <b>Q20</b> Have you modified the infusion protocols (tick all that apply)                                                          | <b>No – the protocols remain the same</b>                                                                           |
| <b>Q21</b> How many patients have cancelled / delayed their infusion due to concern about attending and the risk of coronavirus?   | <b>6-10%</b>                                                                                                        |
| <b>Q22</b> If patients have delayed / cancelled their infusions – have any had disease flare                                       | <b>Yes: they had infusion and responded</b>                                                                         |
| <b>Q23</b> How many patients that receive biologic infusions for IBD at your centre have tested positive for coronavirus<br>0      |                                                                                                                     |

**Q24** What sources of information support are there for your patients

**We have always had a telephone help line / email address**

---

**Q25** Please list any other modifications you have made to your infusion centre in the text box below

**Respondent skipped this question**

---

#8

**COMPLETE**

**Collector:** Email Invitation 1 (Email)  
**Started:** Monday, April 13, 2020 9:14:46 PM  
**Last Modified:** Monday, April 13, 2020 9:23:00 PM  
**Time Spent:** 00:08:13  
**Email:** irisdo@clalit.org.il  
**IP Address:** 194.114.146.227

Page 1: IOIBD Survey following Webinar-4 dd 10 April 2020

**Q1 A. BACKGROUND QUESTIONS (before the coronavirus pandemic)1. In which country do you practice:**

Israel

**Q2 About your infusion centre:** **The infusion centre is dedicated to patients with IBD**

**Q3 About staffing of your infusion centre (tick all that apply)Our infusion centre is organised as follows:** **Has IBD specialist nurse input, but infusions given by general nurses**  
 ,  
**Has an attending physician at least 50% of operating hours**

**Q4 About the location of your infusion centre (tick all that apply):** **Our infusion centre is attached to my practice / unit / hospital**

**Q5 5) How many infusions for IBD patients does your IBD centre prescribe each week** **50-100**

**Q6 What percentage of these infusions are "home infusions"** **1-10%**

**Q7 In the infusion unit, which of the following are performed (tick all that apply)** **Disease activity / adverse event assessment,**  
**Routine blood tests,**  
**Therapeutic drug levels.**

**Q8 Do you reduce the duration of infliximab infusions monitoring for patients who are stable on maintenance therapy** **Yes: reduce infusion to 60 minutes**

**Q9 Do you reduce the post infusion monitoring for patient on stable maintenance therapy** **Yes: we do not perform post infusion monitoring for stable patients**

**Q10** MODIFICATIONS INTRODUCED IN RESPONSE TO CORONAVIRUS PANDEMIC10) Have you moved the location of your infusion centre: **Yes: it moved to a new location in the medical centre**

**Q11** Has your infusion centre experienced a change its capacity: **Yes, the capacity for infusion has increased as we have amalgamated with other services**

**Q12** Have you changed the case mix attending the infusion centre (tick all that apply): **Yes: we share the infusion centre with other specialties**

**Q13** Have you changed the staffing of the infusion centre: **Yes we now use general nurses / other specialty nurses/other GI nurses to deliver infusions**

**Q14** Are patients called in advance of an infusion to screen them for coronavirus symptoms: **YES**

**Q15** Are patients screened on arrival at the infusion centre for fever / symptoms of coronavirus: **YES**

**Q16** How many patients have a positive screen and require their infusion to be rescheduled:

0

**Q17** If someone has a fever or “influenza like illness” on screening how long are you delaying their infusions for consult with ID

**Q18** What other modifications have you implemented (tick all that apply): **Increased spacing between infusion chairs, Increased cleaning in between infusions, Reduced number of patients attending to allow social distancing**,  
OTHER:: Patients using masks, staff using PPE

**Q19** What modifications to patient assessment have you made (tick all that apply) **Routine bloods tests are not taken, Drug levels are not taken**

**Q20** Have you modified the infusion protocols (tick all that apply) **We have switched iv premedication to oral where possible**

**Q21** How many patients have cancelled / delayed their infusion due to concern about attending and the risk of coronavirus? **<5%**

**Q22** If patients have delayed / cancelled their infusions – have any had disease flare **No: all have remained well**

---

**Q23** How many patients that receive biologic infusions for IBD at your centre have tested positive for coronavirus

So far unaware of any

---

**Q24** What sources of information support are there for your patients

**We have always had a telephone help line / email address**

,

**We have produced a patient information sheet in response to coronavirus**

---

**Q25** Please list any other modifications you have made to your infusion centre in the text box below

Moving the whole center from the old location that transformed to "corona", to another location in main hospital, within a week

---



#9

**COMPLETE**

**Collector:** Email Invitation 1 (Email)  
**Started:** Monday, April 13, 2020 9:21:47 PM  
**Last Modified:** Monday, April 13, 2020 9:27:28 PM  
**Time Spent:** 00:05:40  
**Email:** wsandborn@ucsd.edu  
**IP Address:** 169.228.165.140

Page 1: IOIBD Survey following Webinar-4 dd 10 April 2020

**Q1 A. BACKGROUND QUESTIONS (before the coronavirus pandemic)1. In which country do you practice:**

United States

**Q2 About your infusion centre:**

**The infusion centre accepts patients from different specialities**

**Q3 About staffing of your infusion centre (tick all that apply)Our infusion centre is organised as follows:**

**Staffed purely by general nurses to deliver infusions**

**Q4 About the location of your infusion centre (tick all that apply):**

**Our infusion centre is attached to my practice / unit / hospital**

**Our infusion centre is located in the community,**

**Our infusion centre is shared with other IBD centres**

**Q5 5) How many infusions for IBD patients does your IBD centre prescribe each week**

**100-200**

**Q6 What percentage of these infusions are "home infusions"**

**1-10%**

**Q7 In the infusion unit, which of the following are performed (tick all that apply)**

**Routine blood tests,**

**Therapeutic drug levels.**

**Q8 Do you reduce the duration of infliximab infusions monitoring for patients who are stable on maintenance therapy**

**No: all infusions are 120 minutes**

**Q9 Do you reduce the post infusion monitoring for patient on stable maintenance therapy**

**No all patients are monitored for standard time after an infusion**

|                                                                                                                                                     |                                                                                                                              |
|-----------------------------------------------------------------------------------------------------------------------------------------------------|------------------------------------------------------------------------------------------------------------------------------|
| <p><b>Q10</b> MODIFICATIONS INTRODUCED IN RESPONSE TO CORONAVIRUS PANDEMIC10) Have you moved the location of your infusion centre:</p>              | <p><b>No: it remains attached to my centre / practice / hospital</b></p>                                                     |
| <p><b>Q11</b> Has your infusion centre experienced a change its capacity:</p>                                                                       | <p><b>No, the capacity of infusions has remained the same</b></p>                                                            |
| <p><b>Q12</b> Have you changed the case mix attending the infusion centre (tick all that apply):</p>                                                | <p><b>No: it has always received patients from different specialities</b></p>                                                |
| <p><b>Q13</b> Have you changed the staffing of the infusion centre:</p>                                                                             | <p><b>No</b></p>                                                                                                             |
| <p><b>Q14</b> Are patients called in advance of an infusion to screen them for coronavirus symptoms:</p>                                            | <p><b>YES</b></p>                                                                                                            |
| <p><b>Q15</b> Are patients screened on arrival at the infusion centre for fever / symptoms of coronavirus:</p>                                      | <p><b>YES</b></p>                                                                                                            |
| <p><b>Q16</b> How many patients have a positive screen and require their infusion to be rescheduled:<br/><br/>Unknown</p>                           |                                                                                                                              |
| <p><b>Q17</b> If someone has a fever or “influenza like illness” on screening how long are you delaying their infusions for<br/><br/>10-14 days</p> |                                                                                                                              |
| <p><b>Q18</b> What other modifications have you implemented (tick all that apply):</p>                                                              | <p><b>Increased spacing between infusion chairs,<br/>Reduced number of patients attending to allow social distancing</b></p> |
| <p><b>Q19</b> What modifications to patient assessment have you made (tick all that apply)</p>                                                      | <p><b>Respondent skipped this question</b></p>                                                                               |
| <p><b>Q20</b> Have you modified the infusion protocols (tick all that apply)</p>                                                                    | <p><b>No – the protocols remain the same</b></p>                                                                             |
| <p><b>Q21</b> How many patients have cancelled / delayed their infusion due to concern about attending and the risk of coronavirus?</p>             | <p><b>20-50%</b></p>                                                                                                         |
| <p><b>Q22</b> If patients have delayed / cancelled their infusions – have any had disease flare</p>                                                 | <p><b>No: all have remained well</b></p>                                                                                     |

**Q23** How many patients that receive biologic infusions for IBD at your centre have tested positive for coronavirus

3

---

**Q24** What sources of information support are there for your patients

**We have always had a telephone help line / email address**

---

**Q25** Please list any other modifications you have made to your infusion centre in the text box below

**Respondent skipped this question**

---

# #10

**COMPLETE**

**Collector:** Email Invitation 1 (Email)  
**Started:** Monday, April 13, 2020 10:46:42 PM  
**Last Modified:** Monday, April 13, 2020 10:50:07 PM  
**Time Spent:** 00:03:24  
**Email:** richard.gearry@cdhb.govt.nz  
**IP Address:** 121.74.122.47

Page 1: IOIBD Survey following Webinar-4 dd 10 April 2020

**Q1 A. BACKGROUND QUESTIONS (before the coronavirus pandemic)1. In which country do you practice:**

New Zealand

**Q2 About your infusion centre:** **The infusion centre accepts patients from different specialities**

**Q3 About staffing of your infusion centre (tick all that apply)Our infusion centre is organised as follows:** **Staffed purely by general nurses to deliver infusions**

**Q4 About the location of your infusion centre (tick all that apply):** **Our infusion centre is attached to my practice / unit / hospital**  
,  
**Our infusion centre is located in the community**

**Q5 5) How many infusions for IBD patients does your IBD centre prescribe each week** **100-200**

**Q6 What percentage of these infusions are "home infusions"** **0%**

**Q7 In the infusion unit, which of the following are performed (tick all that apply)** **Routine blood tests,**  
**Therapeutic drug levels.**

**Q8 Do you reduce the duration of infliximab infusions monitoring for patients who are stable on maintenance therapy** **Yes: reduce to 30 minutes**

**Q9 Do you reduce the post infusion monitoring for patient on stable maintenance therapy** **Yes: we do not perform post infusion monitoring for stable patients**

|                                                                                                                                             |                                                                                                                                                                           |
|---------------------------------------------------------------------------------------------------------------------------------------------|---------------------------------------------------------------------------------------------------------------------------------------------------------------------------|
| <p><b>Q10</b> MODIFICATIONS INTRODUCED IN RESPONSE TO CORONAVIRUS PANDEMIC10) Have you moved the location of your infusion centre:</p>      | <p><b>No: it remains in the same community setting</b></p>                                                                                                                |
| <p><b>Q11</b> Has your infusion centre experienced a change its capacity:</p>                                                               | <p><b>Yes, the capacity for infusions has reduced</b></p>                                                                                                                 |
| <p><b>Q12</b> Have you changed the case mix attending the infusion centre (tick all that apply):</p>                                        | <p><b>No: it has always received patients from different specialities</b></p>                                                                                             |
| <p><b>Q13</b> Have you changed the staffing of the infusion centre:</p>                                                                     | <p><b>No</b></p>                                                                                                                                                          |
| <p><b>Q14</b> Are patients called in advance of an infusion to screen them for coronavirus symptoms:</p>                                    | <p><b>YES</b></p>                                                                                                                                                         |
| <p><b>Q15</b> Are patients screened on arrival at the infusion centre for fever / symptoms of coronavirus:</p>                              | <p><b>YES</b></p>                                                                                                                                                         |
| <p><b>Q16</b> How many patients have a positive screen and require their infusion to be rescheduled:<br/>0</p>                              |                                                                                                                                                                           |
| <p><b>Q17</b> If someone has a fever or “influenza like illness” on screening how long are you delaying their infusions for<br/>1 month</p> |                                                                                                                                                                           |
| <p><b>Q18</b> What other modifications have you implemented (tick all that apply):</p>                                                      | <p><b>Increased spacing between infusion chairs,<br/>Increased cleaning in between infusions,<br/>Reduced number of patients attending to allow social distancing</b></p> |
| <p><b>Q19</b> What modifications to patient assessment have you made (tick all that apply)</p>                                              | <p><b>Drug levels are not taken</b></p>                                                                                                                                   |
| <p><b>Q20</b> Have you modified the infusion protocols (tick all that apply)</p>                                                            | <p><b>We have reduced infusion duration for stable patients</b></p>                                                                                                       |
| <p><b>Q21</b> How many patients have cancelled / delayed their infusion due to concern about attending and the risk of coronavirus?</p>     | <p><b>6-10%</b></p>                                                                                                                                                       |
| <p><b>Q22</b> If patients have delayed / cancelled their infusions – have any had disease flare</p>                                         | <p><b>No: all have remained well</b></p>                                                                                                                                  |

**Q23** How many patients that receive biologic infusions for IBD at your centre have tested positive for coronavirus

0

---

**Q24** What sources of information support are there for your patients

**We have always had a telephone help line / email address**

,

**We have produced a patient information sheet in response to coronavirus**

---

**Q25** Please list any other modifications you have made to your infusion centre in the text box below

**Respondent skipped this question**

---

# #11

**COMPLETE**

**Collector:** Email Invitation 1 (Email)  
**Started:** Tuesday, April 14, 2020 4:42:22 AM  
**Last Modified:** Tuesday, April 14, 2020 4:46:09 AM  
**Time Spent:** 00:03:47  
**Email:** corey.a.siegel@hitchcock.org  
**IP Address:** 76.24.252.103

Page 1: IOIBD Survey following Webinar-4 dd 10 April 2020

**Q1 A. BACKGROUND QUESTIONS (before the coronavirus pandemic)1. In which country do you practice:**

US

**Q2 About your infusion centre:** **The infusion centre accepts patients from different specialities**

**Q3 About staffing of your infusion centre (tick all that apply)Our infusion centre is organised as follows:** **Staffed purely by general nurses to deliver infusions**

**Q4 About the location of your infusion centre (tick all that apply):** **Our infusion centre is attached to my practice / unit / hospital**

**Q5 5) How many infusions for IBD patients does your IBD centre prescribe each week** **50-100**

**Q6 What percentage of these infusions are "home infusions"** **11-30%**

**Q7 In the infusion unit, which of the following are performed (tick all that apply)** **Routine blood tests**

**Q8 Do you reduce the duration of infliximab infusions monitoring for patients who are stable on maintenance therapy** **Yes: reduce infusion to 60 minutes**

**Q9 Do you reduce the post infusion monitoring for patient on stable maintenance therapy** **Yes: we do not perform post infusion monitoring for stable patients**

**Q10 MODIFICATIONS INTRODUCED IN RESPONSE TO CORONAVIRUS PANDEMIC10) Have you moved the location of your infusion centre:** **No: it remains attached to my centre / practice / hospital**

|                                                                                                                                             |                                                                                                                                                                          |
|---------------------------------------------------------------------------------------------------------------------------------------------|--------------------------------------------------------------------------------------------------------------------------------------------------------------------------|
| <b>Q11</b> Has your infusion centre experienced a change its capacity:                                                                      | <b>No, the capacity of infusions has remained the same</b>                                                                                                               |
| <b>Q12</b> Have you changed the case mix attending the infusion centre (tick all that apply):                                               | <b>No: it has always received patients from different specialities</b>                                                                                                   |
| <b>Q13</b> Have you changed the staffing of the infusion centre:                                                                            | <b>No</b>                                                                                                                                                                |
| <b>Q14</b> Are patients called in advance of an infusion to screen them for coronavirus symptoms:                                           | <b>YES</b>                                                                                                                                                               |
| <b>Q15</b> Are patients screened on arrival at the infusion centre for fever / symptoms of coronavirus:                                     | <b>YES</b>                                                                                                                                                               |
| <b>Q16</b> How many patients have a positive screen and require their infusion to be rescheduled:<br>minimal                                |                                                                                                                                                                          |
| <b>Q17</b> If someone has a fever or “influenza like illness” on screening how long are you delaying their infusions for<br>14 days minimum |                                                                                                                                                                          |
| <b>Q18</b> What other modifications have you implemented (tick all that apply):                                                             | <b>Increased spacing between infusion chairs,<br/>Increased cleaning in between infusions,<br/>Altered the threshold for IV iron infusions to reduce patient numbers</b> |
| <b>Q19</b> What modifications to patient assessment have you made (tick all that apply)                                                     | <b>Respondent skipped this question</b>                                                                                                                                  |
| <b>Q20</b> Have you modified the infusion protocols (tick all that apply)                                                                   | <b>No – the protocols remain the same</b>                                                                                                                                |
| <b>Q21</b> How many patients have cancelled / delayed their infusion due to concern about attending and the risk of coronavirus?            | <b>&lt;5%</b>                                                                                                                                                            |
| <b>Q22</b> If patients have delayed / cancelled their infusions – have any had disease flare                                                | <b>No: all have remained well</b>                                                                                                                                        |
| <b>Q23</b> How many patients that receive biologic infusions for IBD at your centre have tested positive for coronavirus<br><5              |                                                                                                                                                                          |



**Q24** What sources of information support are there for your patients

**We have always had a telephone help line / email address**

,

**We have set up a telephone help line / email address in response to coronavirus**

,

**We have produced a patient information sheet in response to coronavirus**

---

**Q25** Please list any other modifications you have made to your infusion centre in the text box below

**Respondent skipped this question**

---

# #12

**COMPLETE**

**Collector:** Email Invitation 1 (Email)  
**Started:** Tuesday, April 14, 2020 6:49:14 AM  
**Last Modified:** Tuesday, April 14, 2020 7:00:22 AM  
**Time Spent:** 00:11:08  
**Email:** charles.bernstein@umanitoba.ca  
**IP Address:** 142.161.197.53

Page 1: IOIBD Survey following Webinar-4 dd 10 April 2020

**Q1 A. BACKGROUND QUESTIONS (before the coronavirus pandemic)1. In which country do you practice:**

canada

**Q2 About your infusion centre:** **The infusion centre is dedicated to patients with IBD**

**Q3 About staffing of your infusion centre (tick all that apply)Our infusion centre is organised as follows:** **Staffed purely by general nurses to deliver infusions**

**Q4 About the location of your infusion centre (tick all that apply):** **Our infusion centre is located in the community**

**Q5 5) How many infusions for IBD patients does your IBD centre prescribe each week** **10-50**

**Q6 What percentage of these infusions are "home infusions"** **0%**

**Q7 In the infusion unit, which of the following are performed (tick all that apply)** **Disease activity / adverse event assessment,  
Routine blood tests,  
Therapeutic drug levels.**

**Q8 Do you reduce the duration of infliximab infusions monitoring for patients who are stable on maintenance therapy** **Yes: reduce infusion to 60 minutes**

**Q9 Do you reduce the post infusion monitoring for patient on stable maintenance therapy** **Yes: post infusion monitoring is reduced**

**Q10 MODIFICATIONS INTRODUCED IN RESPONSE TO CORONAVIRUS PANDEMIC10) Have you moved the location of your infusion centre:** **No: it remains in the same community setting**

|                                                                                                                                                     |                                                                                                                                                         |
|-----------------------------------------------------------------------------------------------------------------------------------------------------|---------------------------------------------------------------------------------------------------------------------------------------------------------|
| <b>Q11</b> Has your infusion centre experienced a change its capacity:                                                                              | <b>No, the capacity of infusions has remained the same</b>                                                                                              |
| <b>Q12</b> Have you changed the case mix attending the infusion centre (tick all that apply):                                                       | <b>No: it has always received patients from different specialities</b>                                                                                  |
| <b>Q13</b> Have you changed the staffing of the infusion centre:                                                                                    | <b>No</b>                                                                                                                                               |
| <b>Q14</b> Are patients called in advance of an infusion to screen them for coronavirus symptoms:                                                   | <b>YES</b>                                                                                                                                              |
| <b>Q15</b> Are patients screened on arrival at the infusion centre for fever / symptoms of coronavirus:                                             | <b>YES</b>                                                                                                                                              |
| <b>Q16</b> How many patients have a positive screen and require their infusion to be rescheduled:<br><br>i do not know                              |                                                                                                                                                         |
| <b>Q17</b> If someone has a fever or “influenza like illness” on screening how long are you delaying their infusions for until symptoms have abated |                                                                                                                                                         |
| <b>Q18</b> What other modifications have you implemented (tick all that apply):                                                                     | <b>Increased spacing between infusion chairs,<br/>Increased cleaning in between infusions,<br/>Increased in hours of operation to maintain capacity</b> |
| <b>Q19</b> What modifications to patient assessment have you made (tick all that apply)                                                             | <b>Respondent skipped this question</b>                                                                                                                 |
| <b>Q20</b> Have you modified the infusion protocols (tick all that apply)                                                                           | <b>No – the protocols remain the same</b>                                                                                                               |
| <b>Q21</b> How many patients have cancelled / delayed their infusion due to concern about attending and the risk of coronavirus?                    | <b>&lt;5%</b>                                                                                                                                           |
| <b>Q22</b> If patients have delayed / cancelled their infusions – have any had disease flare                                                        | <b>No: all have remained well</b>                                                                                                                       |
| <b>Q23</b> How many patients that receive biologic infusions for IBD at your centre have tested positive for coronavirus<br><br><5                  |                                                                                                                                                         |

**Q24** What sources of information support are there for your patients

**We have always had a telephone help line / email address**

---

**Q25** Please list any other modifications you have made to your infusion centre in the text box below

**Respondent skipped this question**

---

# #13

**COMPLETE**

**Collector:** Email Invitation 1 (Email)  
**Started:** Tuesday, April 14, 2020 9:25:17 AM  
**Last Modified:** Tuesday, April 14, 2020 9:29:14 AM  
**Time Spent:** 00:03:56  
**Email:** severine.vermeire@uzleuven.be  
**IP Address:** 193.58.148.22

Page 1: IOIBD Survey following Webinar-4 dd 10 April 2020

**Q1 A. BACKGROUND QUESTIONS (before the coronavirus pandemic)1. In which country do you practice:**

Belgium

**Q2 About your infusion centre:**

**The infusion centre is dedicated to patients with IBD**

**Q3 About staffing of your infusion centre (tick all that apply)Our infusion centre is organised as follows:**

**Staffed purely by general nurses to deliver infusions,  
Has IBD specialist nurse input, but infusions given by  
general nurses**

**Has an attending physician at least 50% of operating  
hours**

**Q4 About the location of your infusion centre (tick all that apply):**

**Our infusion centre is attached to my practice / unit /  
hospital**

**Q5 5) How many infusions for IBD patients does your IBD centre prescribe each week**

**100-200**

**Q6 What percentage of these infusions are "home infusions"**

**0%**

**Q7 In the infusion unit, which of the following are performed (tick all that apply)**

**Disease activity / adverse event assessment,**

**Routine blood tests,**

**Therapeutic drug levels.**

**Q8 Do you reduce the duration of infliximab infusions monitoring for patients who are stable on maintenance therapy**

**Yes: reduce infusion to 60 minutes**

**Q9 Do you reduce the post infusion monitoring for patient on stable maintenance therapy**

**Yes: we do not perform post infusion monitoring for  
stable patients**

|                                                                                                                                             |                                                                                                                                                                                 |
|---------------------------------------------------------------------------------------------------------------------------------------------|---------------------------------------------------------------------------------------------------------------------------------------------------------------------------------|
| <p><b>Q10</b> MODIFICATIONS INTRODUCED IN RESPONSE TO CORONAVIRUS PANDEMIC10) Have you moved the location of your infusion centre:</p>      | <p><b>No: it remains attached to my centre / practice / hospital</b></p>                                                                                                        |
| <p><b>Q11</b> Has your infusion centre experienced a change its capacity:</p>                                                               | <p><b>No, the capacity of infusions has remained the same</b></p>                                                                                                               |
| <p><b>Q12</b> Have you changed the case mix attending the infusion centre (tick all that apply):</p>                                        | <p><b>No: it remains limited to IBD patients only</b></p>                                                                                                                       |
| <p><b>Q13</b> Have you changed the staffing of the infusion centre:</p>                                                                     | <p><b>No</b></p>                                                                                                                                                                |
| <p><b>Q14</b> Are patients called in advance of an infusion to screen them for coronavirus symptoms:</p>                                    | <p><b>NO</b></p>                                                                                                                                                                |
| <p><b>Q15</b> Are patients screened on arrival at the infusion centre for fever / symptoms of coronavirus:</p>                              | <p><b>YES</b></p>                                                                                                                                                               |
| <p><b>Q16</b> How many patients have a positive screen and require their infusion to be rescheduled:<br/>&lt;5%</p>                         |                                                                                                                                                                                 |
| <p><b>Q17</b> If someone has a fever or “influenza like illness” on screening how long are you delaying their infusions for<br/>2 weeks</p> |                                                                                                                                                                                 |
| <p><b>Q18</b> What other modifications have you implemented (tick all that apply):</p>                                                      | <p><b>Increased spacing between infusion chairs,<br/>Increased cleaning in between infusions,<br/>Altered the threshold for IV iron infusions to reduce patient numbers</b></p> |
| <p><b>Q19</b> What modifications to patient assessment have you made (tick all that apply)</p>                                              | <p><b>Respondent skipped this question</b></p>                                                                                                                                  |
| <p><b>Q20</b> Have you modified the infusion protocols (tick all that apply)</p>                                                            | <p><b>No – the protocols remain the same</b></p>                                                                                                                                |
| <p><b>Q21</b> How many patients have cancelled / delayed their infusion due to concern about attending and the risk of coronavirus?</p>     | <p><b>&lt;5%</b></p>                                                                                                                                                            |
| <p><b>Q22</b> If patients have delayed / cancelled their infusions – have any had disease flare</p>                                         | <p><b>No: all have remained well</b></p>                                                                                                                                        |

**Q23** How many patients that receive biologic infusions for IBD at your centre have tested positive for coronavirus

<1%

---

**Q24** What sources of information support are there for your patients

**We have always had a telephone help line / email address**

,

**We have set up a telephone help line / email address in response to coronavirus**

,

**We have produced a patient information sheet in response to coronavirus**

---

**Q25** Please list any other modifications you have made to your infusion centre in the text box below

no other

---

# #14

**COMPLETE**

**Collector:** Email Invitation 1 (Email)  
**Started:** Tuesday, April 14, 2020 11:42:01 AM  
**Last Modified:** Tuesday, April 14, 2020 11:45:51 AM  
**Time Spent:** 00:03:49  
**Email:** james.lindsay8@nhs.net  
**IP Address:** 161.23.14.43

Page 1: IOIBD Survey following Webinar-4 dd 10 April 2020

**Q1 A. BACKGROUND QUESTIONS (before the coronavirus pandemic)1. In which country do you practice:**

UK

**Q2 About your infusion centre:** **The infusion centre is dedicated to patients with IBD**

**Q3 About staffing of your infusion centre (tick all that apply)Our infusion centre is organised as follows:** **Staffed purely by IBD specialist nurses**

**Q4 About the location of your infusion centre (tick all that apply):** **Our infusion centre is attached to my practice / unit / hospital**

**Q5 5) How many infusions for IBD patients does your IBD centre prescribe each week** **50-100**

**Q6 What percentage of these infusions are "home infusions"** **0%**

**Q7 In the infusion unit, which of the following are performed (tick all that apply)** **Disease activity / adverse event assessment,  
Routine blood tests,  
Therapeutic drug levels.**

**Q8 Do you reduce the duration of infliximab infusions monitoring for patients who are stable on maintenance therapy** **Yes: reduce to 30 minutes**

**Q9 Do you reduce the post infusion monitoring for patient on stable maintenance therapy** **Yes: post infusion monitoring is reduced**

**Q10 MODIFICATIONS INTRODUCED IN RESPONSE TO CORONAVIRUS PANDEMIC10) Have you moved the location of your infusion centre:** **Yes: it has moved to a new location out of the medical centre in response to coronavirus**



|                                                                                                                                                                                                          |                                                                                                                                                                                               |
|----------------------------------------------------------------------------------------------------------------------------------------------------------------------------------------------------------|-----------------------------------------------------------------------------------------------------------------------------------------------------------------------------------------------|
| <p><b>Q11</b> Has your infusion centre experienced a change its capacity:</p>                                                                                                                            | <p><b>Yes, the capacity for infusion has increased as we have amalgamated with other services</b></p>                                                                                         |
| <p><b>Q12</b> Have you changed the case mix attending the infusion centre (tick all that apply):</p>                                                                                                     | <p><b>Yes: we now share the infusion centre with other IBD units</b><br/>,</p> <p><b>Yes: we share the infusion centre with other specialties</b></p>                                         |
| <p><b>Q13</b> Have you changed the staffing of the infusion centre:</p>                                                                                                                                  | <p><b>Yes we now use general nurses / other specialty nurses/other GI nurses to deliver infusions</b></p>                                                                                     |
| <p><b>Q14</b> Are patients called in advance of an infusion to screen them for coronavirus symptoms:</p>                                                                                                 | <p><b>YES</b></p>                                                                                                                                                                             |
| <p><b>Q15</b> Are patients screened on arrival at the infusion centre for fever / symptoms of coronavirus:</p>                                                                                           | <p><b>YES</b></p>                                                                                                                                                                             |
| <p><b>Q16</b> How many patients have a positive screen and require their infusion to be rescheduled:<br/><br/>0</p>                                                                                      |                                                                                                                                                                                               |
| <p><b>Q17</b> If someone has a fever or “influenza like illness” on screening how long are you delaying their infusions for<br/><br/>2 weeks after temperature have settled (or negative COVID swab)</p> |                                                                                                                                                                                               |
| <p><b>Q18</b> What other modifications have you implemented (tick all that apply):</p>                                                                                                                   | <p><b>Increased spacing between infusion chairs,</b><br/><b>Increased cleaning in between infusions,</b><br/><b>Altered the threshold for IV iron infusions to reduce patient numbers</b></p> |
| <p><b>Q19</b> What modifications to patient assessment have you made (tick all that apply)</p>                                                                                                           | <p><b>Respondent skipped this question</b></p>                                                                                                                                                |
| <p><b>Q20</b> Have you modified the infusion protocols (tick all that apply)</p>                                                                                                                         | <p><b>Respondent skipped this question</b></p>                                                                                                                                                |
| <p><b>Q21</b> How many patients have cancelled / delayed their infusion due to concern about attending and the risk of coronavirus?</p>                                                                  | <p><b>&lt;5%</b></p>                                                                                                                                                                          |
| <p><b>Q22</b> If patients have delayed / cancelled their infusions – have any had disease flare</p>                                                                                                      | <p><b>No: all have remained well</b></p>                                                                                                                                                      |

**Q23** How many patients that receive biologic infusions for IBD at your centre have tested positive for coronavirus

1

---

**Q24** What sources of information support are there for your patients

**We have always had a telephone help line / email address**

,

**We have produced a patient information sheet in response to coronavirus**

---

**Q25** Please list any other modifications you have made to your infusion centre in the text box below

**Respondent skipped this question**

---

# #15

**COMPLETE**

**Collector:** Email Invitation 1 (Email)  
**Started:** Tuesday, April 14, 2020 5:01:01 PM  
**Last Modified:** Tuesday, April 14, 2020 5:07:39 PM  
**Time Spent:** 00:06:38  
**Email:** matthieu.allez@aphp.fr  
**IP Address:** 164.2.255.244

Page 1: IOIBD Survey following Webinar-4 dd 10 April 2020

**Q1 A. BACKGROUND QUESTIONS (before the coronavirus pandemic)1. In which country do you practice:**

France

**Q2 About your infusion centre:** **The infusion centre is dedicated to patients with IBD**

**Q3 About staffing of your infusion centre (tick all that apply)Our infusion centre is organised as follows:** **Has IBD specialist nurse input, but infusions given by general nurses**  
 ,  
**Has an attending physician at least 50% of operating hours**

**Q4 About the location of your infusion centre (tick all that apply):** **Our infusion centre is attached to my practice / unit / hospital**

**Q5 5) How many infusions for IBD patients does your IBD centre prescribe each week** **50-100**

**Q6 What percentage of these infusions are "home infusions"** **0%**

**Q7 In the infusion unit, which of the following are performed (tick all that apply)** **Disease activity / adverse event assessment,**  
**Routine blood tests,**  
**Therapeutic drug levels.**

**Q8 Do you reduce the duration of infliximab infusions monitoring for patients who are stable on maintenance therapy** **Yes: reduce infusion to 60 minutes**

**Q9 Do you reduce the post infusion monitoring for patient on stable maintenance therapy** **Yes: we do not perform post infusion monitoring for stable patients**

|                                                                                                                                                                                                               |                                                                                                                              |
|---------------------------------------------------------------------------------------------------------------------------------------------------------------------------------------------------------------|------------------------------------------------------------------------------------------------------------------------------|
| <p><b>Q10</b> MODIFICATIONS INTRODUCED IN RESPONSE TO CORONAVIRUS PANDEMIC10) Have you moved the location of your infusion centre:</p>                                                                        | <p><b>No: it remains attached to my centre / practice / hospital</b></p>                                                     |
| <p><b>Q11</b> Has your infusion centre experienced a change its capacity:</p>                                                                                                                                 | <p><b>No, the capacity of infusions has remained the same</b></p>                                                            |
| <p><b>Q12</b> Have you changed the case mix attending the infusion centre (tick all that apply):</p>                                                                                                          | <p><b>No: it remains limited to IBD patients only</b></p>                                                                    |
| <p><b>Q13</b> Have you changed the staffing of the infusion centre:</p>                                                                                                                                       | <p><b>No</b></p>                                                                                                             |
| <p><b>Q14</b> Are patients called in advance of an infusion to screen them for coronavirus symptoms:</p>                                                                                                      | <p><b>NO</b></p>                                                                                                             |
| <p><b>Q15</b> Are patients screened on arrival at the infusion centre for fever / symptoms of coronavirus:</p>                                                                                                | <p><b>YES</b></p>                                                                                                            |
| <p><b>Q16</b> How many patients have a positive screen and require their infusion to be rescheduled:<br/><br/>2</p>                                                                                           | <p><b>2</b></p>                                                                                                              |
| <p><b>Q17</b> If someone has a fever or “influenza like illness” on screening how long are you delaying their infusions for<br/><br/>2 weeks after the start of symptoms and at least 2 days symptom-free</p> | <p><b>2 weeks after the start of symptoms and at least 2 days symptom-free</b></p>                                           |
| <p><b>Q18</b> What other modifications have you implemented (tick all that apply):</p>                                                                                                                        | <p><b>Increased spacing between infusion chairs,<br/>Reduced number of patients attending to allow social distancing</b></p> |
| <p><b>Q19</b> What modifications to patient assessment have you made (tick all that apply)</p>                                                                                                                | <p><b>Respondent skipped this question</b></p>                                                                               |
| <p><b>Q20</b> Have you modified the infusion protocols (tick all that apply)</p>                                                                                                                              | <p><b>No – the protocols remain the same</b></p>                                                                             |
| <p><b>Q21</b> How many patients have cancelled / delayed their infusion due to concern about attending and the risk of coronavirus?</p>                                                                       | <p><b>11-20%</b></p>                                                                                                         |
| <p><b>Q22</b> If patients have delayed / cancelled their infusions – have any had disease flare</p>                                                                                                           | <p><b>No: all have remained well</b></p>                                                                                     |

**Q23** How many patients that receive biologic infusions for IBD at your centre have tested positive for coronavirus

0

---

**Q24** What sources of information support are there for your patients

**We have always had a telephone help line / email address**

,

**We have produced a patient information sheet in response to coronavirus**

---

**Q25** Please list any other modifications you have made to your infusion centre in the text box below

**Respondent skipped this question**

---

# #16

**COMPLETE**

**Collector:** Email Invitation 1 (Email)  
**Started:** Tuesday, April 14, 2020 5:34:22 PM  
**Last Modified:** Tuesday, April 14, 2020 5:38:59 PM  
**Time Spent:** 00:04:36  
**Email:** uma.mahadevan@ucsf.edu  
**IP Address:** 128.218.43.170

Page 1: IOIBD Survey following Webinar-4 dd 10 April 2020

**Q1 A. BACKGROUND QUESTIONS (before the coronavirus pandemic)1. In which country do you practice:**

United States

**Q2 About your infusion centre:**

**The infusion centre accepts patients from different specialities**

**Q3 About staffing of your infusion centre (tick all that apply)Our infusion centre is organised as follows:**

**Staffed purely by general nurses to deliver infusions,  
Has an attending physician at least 50% of operating hours**

**Q4 About the location of your infusion centre (tick all that apply):**

**Our infusion centre is attached to my practice / unit / hospital**

**Q5 5) How many infusions for IBD patients does your IBD centre prescribe each week**

**100-200**

**Q6 What percentage of these infusions are "home infusions"**

**>50%**

**Q7 In the infusion unit, which of the following are performed (tick all that apply)**

**Routine blood tests,  
Therapeutic drug levels.**

**Q8 Do you reduce the duration of infliximab infusions monitoring for patients who are stable on maintenance therapy**

**Yes: reduce infusion to 60 minutes**

**Q9 Do you reduce the post infusion monitoring for patient on stable maintenance therapy**

**Yes: we do not perform post infusion monitoring for stable patients**

**Q10 MODIFICATIONS INTRODUCED IN RESPONSE TO CORONAVIRUS PANDEMIC10) Have you moved the location of your infusion centre:**

**No: it remains attached to my centre / practice / hospital**

|                                                                                                                                                                                                 |                                                                                                                                                              |
|-------------------------------------------------------------------------------------------------------------------------------------------------------------------------------------------------|--------------------------------------------------------------------------------------------------------------------------------------------------------------|
| <b>Q11</b> Has your infusion centre experienced a change its capacity:                                                                                                                          | <b>No, the capacity of infusions has remained the same</b>                                                                                                   |
| <b>Q12</b> Have you changed the case mix attending the infusion centre (tick all that apply):                                                                                                   | <b>No: it has always received patients from different specialities</b>                                                                                       |
| <b>Q13</b> Have you changed the staffing of the infusion centre:                                                                                                                                | <b>No</b>                                                                                                                                                    |
| <b>Q14</b> Are patients called in advance of an infusion to screen them for coronavirus symptoms:                                                                                               | <b>YES</b>                                                                                                                                                   |
| <b>Q15</b> Are patients screened on arrival at the infusion centre for fever / symptoms of coronavirus:                                                                                         | <b>YES</b>                                                                                                                                                   |
| <b>Q16</b> How many patients have a positive screen and require their infusion to be rescheduled:<br><br><5%                                                                                    |                                                                                                                                                              |
| <b>Q17</b> If someone has a fever or “influenza like illness” on screening how long are you delaying their infusions for<br><br>Tested for Sars-Co-V2. If negative and no fever, they come back |                                                                                                                                                              |
| <b>Q18</b> What other modifications have you implemented (tick all that apply):                                                                                                                 | <b>Increased spacing between infusion chairs,<br/>Increased cleaning in between infusions,<br/>Increased the number of patients receiving home infusions</b> |
| <b>Q19</b> What modifications to patient assessment have you made (tick all that apply)                                                                                                         | <b>Respondent skipped this question</b>                                                                                                                      |
| <b>Q20</b> Have you modified the infusion protocols (tick all that apply)                                                                                                                       | <b>No – the protocols remain the same</b>                                                                                                                    |
| <b>Q21</b> How many patients have cancelled / delayed their infusion due to concern about attending and the risk of coronavirus?                                                                | <b>&lt;5%</b>                                                                                                                                                |
| <b>Q22</b> If patients have delayed / cancelled their infusions – have any had disease flare                                                                                                    | <b>No: all have remained well</b>                                                                                                                            |
| <b>Q23</b> How many patients that receive biologic infusions for IBD at your centre have tested positive for coronavirus<br><br>0                                                               |                                                                                                                                                              |

**Q24** What sources of information support are there for your patients

**We have always had a telephone help line / email address**

,

**We have produced a patient information sheet in response to coronavirus**

---

**Q25** Please list any other modifications you have made to your infusion centre in the text box below

**Respondent skipped this question**

---



#17

COMPLETE

**Collector:** Email Invitation 1 (Email)  
**Started:** Tuesday, April 14, 2020 7:47:53 PM  
**Last Modified:** Tuesday, April 14, 2020 7:54:09 PM  
**Time Spent:** 00:06:15  
**Email:** moum.bjorn@gmail.com  
**IP Address:** 81.167.171.161

Page 1: IOIBD Survey following Webinar-4 dd 10 April 2020

**Q1 A. BACKGROUND QUESTIONS (before the coronavirus pandemic)1. In which country do you practice:**

norway

**Q2 About your infusion centre:** **The infusion centre accepts patients from different specialities**

**Q3 About staffing of your infusion centre (tick all that apply)Our infusion centre is organised as follows:** **Staffed purely by IBD specialist nurses**

**Q4 About the location of your infusion centre (tick all that apply):** **Our infusion centre is attached to my practice / unit / hospital**

**Q5 5) How many infusions for IBD patients does your IBD centre prescribe each week** **100-200**

**Q6 What percentage of these infusions are "home infusions"** **0%**

**Q7 In the infusion unit, which of the following are performed (tick all that apply)** **Disease activity / adverse event assessment,  
Routine blood tests,  
Therapeutic drug levels.**

**Q8 Do you reduce the duration of infliximab infusions monitoring for patients who are stable on maintenance therapy** **Yes: reduce infusion to 60 minutes**

**Q9 Do you reduce the post infusion monitoring for patient on stable maintenance therapy** **Yes: we do not perform post infusion monitoring for stable patients**

**Q10 MODIFICATIONS INTRODUCED IN RESPONSE TO CORONAVIRUS PANDEMIC10) Have you moved the location of your infusion centre:** **No: it remains attached to my centre / practice / hospital**

|                                                                                                                                                  |                                                                                                                                                                                                                                                           |
|--------------------------------------------------------------------------------------------------------------------------------------------------|-----------------------------------------------------------------------------------------------------------------------------------------------------------------------------------------------------------------------------------------------------------|
| <p><b>Q11</b> Has your infusion centre experienced a change its capacity:</p>                                                                    | <p><b>No, the capacity of infusions has remained the same</b></p>                                                                                                                                                                                         |
| <p><b>Q12</b> Have you changed the case mix attending the infusion centre (tick all that apply):</p>                                             | <p><b>No: it has always received patients from different specialities</b></p>                                                                                                                                                                             |
| <p><b>Q13</b> Have you changed the staffing of the infusion centre:</p>                                                                          | <p><b>No</b></p>                                                                                                                                                                                                                                          |
| <p><b>Q14</b> Are patients called in advance of an infusion to screen them for coronavirus symptoms:</p>                                         | <p><b>NO</b></p>                                                                                                                                                                                                                                          |
| <p><b>Q15</b> Are patients screened on arrival at the infusion centre for fever / symptoms of coronavirus:</p>                                   | <p><b>YES</b></p>                                                                                                                                                                                                                                         |
| <p><b>Q16</b> How many patients have a positive screen and require their infusion to be rescheduled:<br/><br/>2 of 25 per day</p>                |                                                                                                                                                                                                                                                           |
| <p><b>Q17</b> If someone has a fever or “influenza like illness” on screening how long are you delaying their infusions for<br/><br/>2 weeks</p> |                                                                                                                                                                                                                                                           |
| <p><b>Q18</b> What other modifications have you implemented (tick all that apply):</p>                                                           | <p><b>Increased spacing between infusion chairs,<br/>Increased cleaning in between infusions,<br/>Reduced number of patients attending to allow social distancing<br/>,<br/>Altered the threshold for IV iron infusions to reduce patient numbers</b></p> |
| <p><b>Q19</b> What modifications to patient assessment have you made (tick all that apply)</p>                                                   | <p><b>Respondent skipped this question</b></p>                                                                                                                                                                                                            |
| <p><b>Q20</b> Have you modified the infusion protocols (tick all that apply)</p>                                                                 | <p><b>We have reduced infusion duration for stable patients,<br/>We have reduced monitoring post infusion for stable patients</b></p>                                                                                                                     |
| <p><b>Q21</b> How many patients have cancelled / delayed their infusion due to concern about attending and the risk of coronavirus?</p>          | <p><b>6-10%</b></p>                                                                                                                                                                                                                                       |
| <p><b>Q22</b> If patients have delayed / cancelled their infusions – have any had disease flare</p>                                              | <p><b>No: all have remained well</b></p>                                                                                                                                                                                                                  |

**Q23** How many patients that receive biologic infusions for IBD at your centre have tested positive for coronavirus

2

---

**Q24** What sources of information support are there for your patients

**We have always had a telephone help line / email address**

---

**Q25** Please list any other modifications you have made to your infusion centre in the text box below

**Respondent skipped this question**

---

# #18

**COMPLETE**

**Collector:** Email Invitation 1 (Email)  
**Started:** Wednesday, April 15, 2020 2:16:11 PM  
**Last Modified:** Wednesday, April 15, 2020 2:19:38 PM  
**Time Spent:** 00:03:26  
**Email:** joycemwy@gmail.com  
**IP Address:** 14.136.195.244

Page 1: IOIBD Survey following Webinar-4 dd 10 April 2020

**Q1 A. BACKGROUND QUESTIONS (before the coronavirus pandemic)1. In which country do you practice:**

Hong Kong

**Q2 About your infusion centre:**

**The infusion centre accepts patients from different specialities**

**Q3 About staffing of your infusion centre (tick all that apply)Our infusion centre is organised as follows:**

**Staffed purely by general nurses to deliver infusions,  
Has an attending physician at least 50% of operating hours**

**Q4 About the location of your infusion centre (tick all that apply):**

**Our infusion centre is attached to my practice / unit / hospital**

**Q5 5) How many infusions for IBD patients does your IBD centre prescribe each week**

**10-50**

**Q6 What percentage of these infusions are "home infusions"**

**0%**

**Q7 In the infusion unit, which of the following are performed (tick all that apply)**

**Disease activity / adverse event assessment,  
Routine blood tests**

**Q8 Do you reduce the duration of infliximab infusions monitoring for patients who are stable on maintenance therapy**

**No: all infusions are 120 minutes**

**Q9 Do you reduce the post infusion monitoring for patient on stable maintenance therapy**

**No all patients are monitored for standard time after an infusion**

**Q10 MODIFICATIONS INTRODUCED IN RESPONSE TO CORONAVIRUS PANDEMIC10) Have you moved the location of your infusion centre:**

**No: it remains attached to my centre / practice / hospital**

|                                                                                                                                         |                                                                        |
|-----------------------------------------------------------------------------------------------------------------------------------------|------------------------------------------------------------------------|
| <b>Q11</b> Has your infusion centre experienced a change its capacity:                                                                  | <b>No, the capacity of infusions has remained the same</b>             |
| <b>Q12</b> Have you changed the case mix attending the infusion centre (tick all that apply):                                           | <b>No: it has always received patients from different specialities</b> |
| <b>Q13</b> Have you changed the staffing of the infusion centre:                                                                        | <b>No</b>                                                              |
| <b>Q14</b> Are patients called in advance of an infusion to screen them for coronavirus symptoms:                                       | <b>YES</b>                                                             |
| <b>Q15</b> Are patients screened on arrival at the infusion centre for fever / symptoms of coronavirus:                                 | <b>YES</b>                                                             |
| <b>Q16</b> How many patients have a positive screen and require their infusion to be rescheduled:<br><br>0                              |                                                                        |
| <b>Q17</b> If someone has a fever or “influenza like illness” on screening how long are you delaying their infusions for<br><br>14 days |                                                                        |
| <b>Q18</b> What other modifications have you implemented (tick all that apply):                                                         | <b>OTHER::<br/>None</b>                                                |
| <b>Q19</b> What modifications to patient assessment have you made (tick all that apply)                                                 | <b>Respondent skipped this question</b>                                |
| <b>Q20</b> Have you modified the infusion protocols (tick all that apply)                                                               | <b>No – the protocols remain the same</b>                              |
| <b>Q21</b> How many patients have cancelled / delayed their infusion due to concern about attending and the risk of coronavirus?        | <b>0%</b>                                                              |
| <b>Q22</b> If patients have delayed / cancelled their infusions – have any had disease flare                                            | <b>No: all have remained well</b>                                      |
| <b>Q23</b> How many patients that receive biologic infusions for IBD at your centre have tested positive for coronavirus                | <b>Respondent skipped this question</b>                                |
| <b>Q24</b> What sources of information support are there for your patients                                                              | <b>We have always had a telephone help line / email address</b>        |

**Q25** Please list any other modifications you have made to your infusion centre in the text box below

none

---

# #19

**COMPLETE**

**Collector:** Email Invitation 1 (Email)  
**Started:** Wednesday, April 15, 2020 4:26:44 PM  
**Last Modified:** Wednesday, April 15, 2020 4:34:48 PM  
**Time Spent:** 00:08:04  
**Email:** milan.lukas@email.cz  
**IP Address:** 85.163.87.98

Page 1: IOIBD Survey following Webinar-4 dd 10 April 2020

**Q1 A. BACKGROUND QUESTIONS (before the coronavirus pandemic)1. In which country do you practice:**

Czech Republic

**Q2 About your infusion centre:** **The infusion centre is dedicated to patients with IBD**

**Q3 About staffing of your infusion centre (tick all that apply)Our infusion centre is organised as follows:** **Staffed purely by IBD specialist nurses**

**Q4 About the location of your infusion centre (tick all that apply):** **Our infusion centre is attached to my practice / unit / hospital**

**Q5 5) How many infusions for IBD patients does your IBD centre prescribe each week** **100-200**

**Q6 What percentage of these infusions are "home infusions"** **0%**

**Q7 In the infusion unit, which of the following are performed (tick all that apply)** **Disease activity / adverse event assessment, Routine blood tests, Therapeutic drug levels.**

**Q8 Do you reduce the duration of infliximab infusions monitoring for patients who are stable on maintenance therapy** **Yes: reduce infusion to 60 minutes**

**Q9 Do you reduce the post infusion monitoring for patient on stable maintenance therapy** **Yes: we do not perform post infusion monitoring for stable patients**

**Q10 MODIFICATIONS INTRODUCED IN RESPONSE TO CORONAVIRUS PANDEMIC10) Have you moved the location of your infusion centre:** **No: it remains attached to my centre / practice / hospital**

|                                                                                                                                                      |                                                                                                                                                                                                                                                                                                                                    |
|------------------------------------------------------------------------------------------------------------------------------------------------------|------------------------------------------------------------------------------------------------------------------------------------------------------------------------------------------------------------------------------------------------------------------------------------------------------------------------------------|
| <b>Q11</b> Has your infusion centre experienced a change its capacity:                                                                               | <b>No, the capacity of infusions has remained the same</b>                                                                                                                                                                                                                                                                         |
| <b>Q12</b> Have you changed the case mix attending the infusion centre (tick all that apply):                                                        | <b>No: it remains limited to IBD patients only</b>                                                                                                                                                                                                                                                                                 |
| <b>Q13</b> Have you changed the staffing of the infusion centre:                                                                                     | <b>No</b>                                                                                                                                                                                                                                                                                                                          |
| <b>Q14</b> Are patients called in advance of an infusion to screen them for coronavirus symptoms:                                                    | <b>YES</b>                                                                                                                                                                                                                                                                                                                         |
| <b>Q15</b> Are patients screened on arrival at the infusion centre for fever / symptoms of coronavirus:                                              | <b>YES</b>                                                                                                                                                                                                                                                                                                                         |
| <b>Q16</b> How many patients have a positive screen and require their infusion to be rescheduled:<br><br>3                                           |                                                                                                                                                                                                                                                                                                                                    |
| <b>Q17</b> If someone has a fever or “influenza like illness” on screening how long are you delaying their infusions for<br><br>14 days at the least |                                                                                                                                                                                                                                                                                                                                    |
| <b>Q18</b> What other modifications have you implemented (tick all that apply):                                                                      | <b>Increased spacing between infusion chairs,<br/>Increased cleaning in between infusions,<br/>Reduced number of patients attending to allow social distancing<br/>,<br/>Increased in hours of operation to maintain capacity,<br/>Increased the duration between infusions in response to coronavirus (ie from 8 to 10 weeks)</b> |
| <b>Q19</b> What modifications to patient assessment have you made (tick all that apply)                                                              | <b>Routine bloods tests are not taken</b>                                                                                                                                                                                                                                                                                          |
| <b>Q20</b> Have you modified the infusion protocols (tick all that apply)                                                                            | <b>No – the protocols remain the same</b>                                                                                                                                                                                                                                                                                          |
| <b>Q21</b> How many patients have cancelled / delayed their infusion due to concern about attending and the risk of coronavirus?                     | <b>11-20%</b>                                                                                                                                                                                                                                                                                                                      |
| <b>Q22</b> If patients have delayed / cancelled their infusions – have any had disease flare                                                         | <b>Yes: they had infusion and responded</b>                                                                                                                                                                                                                                                                                        |



**Q23** How many patients that receive biologic infusions for IBD at your centre have tested positive for coronavirus

3 patients

---

**Q24** What sources of information support are there for  
your patients

**We have always had a telephone help line / email  
address**

---

**Q25** Please list any other modifications you have made to your infusion centre in the text box below

none

---

## #20

COMPLETE

**Collector:** Email Invitation 1 (Email)  
**Started:** Wednesday, April 15, 2020 4:37:33 PM  
**Last Modified:** Wednesday, April 15, 2020 4:43:37 PM  
**Time Spent:** 00:06:04  
**Email:** david.sachar@mssm.edu  
**IP Address:** 72.225.150.220

Page 1: IOIBD Survey following Webinar-4 dd 10 April 2020

**Q1 A. BACKGROUND QUESTIONS (before the coronavirus pandemic)1. In which country do you practice:**

United States

**Q2 About your infusion centre:** **The infusion centre accepts patients from different specialities**

**Q3 About staffing of your infusion centre (tick all that apply)Our infusion centre is organised as follows:** **Staffed purely by general nurses to deliver infusions**

**Q4 About the location of your infusion centre (tick all that apply):** **Our infusion centre is attached to my practice / unit / hospital**

**Q5 5) How many infusions for IBD patients does your IBD centre prescribe each week** **10-50**

**Q6 What percentage of these infusions are "home infusions"** **0%**

**Q7 In the infusion unit, which of the following are performed (tick all that apply)** **Disease activity / adverse event assessment, Routine blood tests, Therapeutic drug levels.**

**Q8 Do you reduce the duration of infliximab infusions monitoring for patients who are stable on maintenance therapy** **No: all infusions are 120 minutes**

**Q9 Do you reduce the post infusion monitoring for patient on stable maintenance therapy** **No all patients are monitored for standard time after an infusion**

**Q10 MODIFICATIONS INTRODUCED IN RESPONSE TO CORONAVIRUS PANDEMIC10) Have you moved the location of your infusion centre:** **No: it remains attached to my centre / practice / hospital**

|                                                                                                                                                                                |                                                                                                                                                                                                                                                  |
|--------------------------------------------------------------------------------------------------------------------------------------------------------------------------------|--------------------------------------------------------------------------------------------------------------------------------------------------------------------------------------------------------------------------------------------------|
| <p><b>Q11</b> Has your infusion centre experienced a change its capacity:</p>                                                                                                  | <p><b>No, the capacity of infusions has remained the same</b></p>                                                                                                                                                                                |
| <p><b>Q12</b> Have you changed the case mix attending the infusion centre (tick all that apply):</p>                                                                           | <p><b>No: it has always received patients from different specialities</b></p>                                                                                                                                                                    |
| <p><b>Q13</b> Have you changed the staffing of the infusion centre:</p>                                                                                                        | <p><b>Yes we now use general nurses / other specialty nurses/other GI nurses to deliver infusions</b></p>                                                                                                                                        |
| <p><b>Q14</b> Are patients called in advance of an infusion to screen them for coronavirus symptoms:</p>                                                                       | <p><b>YES</b></p>                                                                                                                                                                                                                                |
| <p><b>Q15</b> Are patients screened on arrival at the infusion centre for fever / symptoms of coronavirus:</p>                                                                 | <p><b>YES</b></p>                                                                                                                                                                                                                                |
| <p><b>Q16</b> How many patients have a positive screen and require their infusion to be rescheduled:<br/><br/>10%</p>                                                          |                                                                                                                                                                                                                                                  |
| <p><b>Q17</b> If someone has a fever or “influenza like illness” on screening how long are you delaying their infusions for<br/><br/>Until symptoms are gone for two weeks</p> |                                                                                                                                                                                                                                                  |
| <p><b>Q18</b> What other modifications have you implemented (tick all that apply):</p>                                                                                         | <p><b>Increased spacing between infusion chairs,<br/>Increased cleaning in between infusions,<br/>Reduced number of patients attending to allow social distancing<br/>,<br/>Switching patients on infusions to subcutaneous alternatives</b></p> |
| <p><b>Q19</b> What modifications to patient assessment have you made (tick all that apply)</p>                                                                                 | <p><b>Respondent skipped this question</b></p>                                                                                                                                                                                                   |
| <p><b>Q20</b> Have you modified the infusion protocols (tick all that apply)</p>                                                                                               | <p><b>No – the protocols remain the same</b></p>                                                                                                                                                                                                 |
| <p><b>Q21</b> How many patients have cancelled / delayed their infusion due to concern about attending and the risk of coronavirus?</p>                                        | <p><b>20-50%</b></p>                                                                                                                                                                                                                             |
| <p><b>Q22</b> If patients have delayed / cancelled their infusions – have any had disease flare</p>                                                                            | <p><b>Yes: they had infusion and responded</b></p>                                                                                                                                                                                               |

**Q23** How many patients that receive biologic infusions for IBD at your centre have tested positive for coronavirus

20%

---

**Q24** What sources of information support are there for your patients

**We have always had a telephone help line / email address**

,

**We have set up a telephone help line / email address in response to coronavirus**

,

**We have produced a patient information sheet in response to coronavirus**

---

**Q25** Please list any other modifications you have made to your infusion centre in the text box below

**Respondent skipped this question**

---

#21

COMPLETE

**Collector:** Email Invitation 1 (Email)  
**Started:** Wednesday, April 15, 2020 4:55:19 PM  
**Last Modified:** Wednesday, April 15, 2020 5:01:55 PM  
**Time Spent:** 00:06:36  
**Email:** curt.tysk@gmail.com  
**IP Address:** 46.230.212.250

Page 1: IOIBD Survey following Webinar-4 dd 10 April 2020

**Q1 A. BACKGROUND QUESTIONS (before the coronavirus pandemic)**1. In which country do you practice:

Sweden

**Q2** About your infusion centre: **The infusion centre is dedicated to patients with IBD**

**Q3** About staffing of your infusion centre (tick all that apply)Our infusion centre is organised as follows: **Staffed purely by IBD specialist nurses**

**Q4** About the location of your infusion centre (tick all that apply): **Our infusion centre is attached to my practice / unit / hospital**

**Q5** 5) How many infusions for IBD patients does your IBD centre prescribe each week **10-50**

**Q6** What percentage of these infusions are "home infusions" **0%**

**Q7** In the infusion unit, which of the following are performed (tick all that apply) **Disease activity / adverse event assessment, Routine blood tests, Therapeutic drug levels.**

**Q8** Do you reduce the duration of infliximab infusions monitoring for patients who are stable on maintenance therapy **Yes: reduce infusion to 60 minutes**

**Q9** Do you reduce the post infusion monitoring for patient on stable maintenance therapy **Yes: post infusion monitoring is reduced**

**Q10** MODIFICATIONS INTRODUCED IN RESPONSE TO CORONAVIRUS PANDEMIC10) Have you moved the location of your infusion centre: **No: it remains attached to my centre / practice / hospital**

|                                                                                                                                                                        |                                                                                                                                                                           |
|------------------------------------------------------------------------------------------------------------------------------------------------------------------------|---------------------------------------------------------------------------------------------------------------------------------------------------------------------------|
| <p><b>Q11</b> Has your infusion centre experienced a change its capacity:</p>                                                                                          | <p><b>Yes, the capacity for infusions has reduced</b></p>                                                                                                                 |
| <p><b>Q12</b> Have you changed the case mix attending the infusion centre (tick all that apply):</p>                                                                   | <p><b>No: it remains limited to IBD patients only</b></p>                                                                                                                 |
| <p><b>Q13</b> Have you changed the staffing of the infusion centre:</p>                                                                                                | <p><b>No</b></p>                                                                                                                                                          |
| <p><b>Q14</b> Are patients called in advance of an infusion to screen them for coronavirus symptoms:</p>                                                               | <p><b>YES</b></p>                                                                                                                                                         |
| <p><b>Q15</b> Are patients screened on arrival at the infusion centre for fever / symptoms of coronavirus:</p>                                                         | <p><b>YES</b></p>                                                                                                                                                         |
| <p><b>Q16</b> How many patients have a positive screen and require their infusion to be rescheduled:<br/>?</p>                                                         | <p><b>?</b></p>                                                                                                                                                           |
| <p><b>Q17</b> If someone has a fever or “influenza like illness” on screening how long are you delaying their infusions for<br/>1-2 weeks and follow-up in between</p> | <p><b>1-2 weeks and follow-up in between</b></p>                                                                                                                          |
| <p><b>Q18</b> What other modifications have you implemented (tick all that apply):</p>                                                                                 | <p><b>Increased spacing between infusion chairs,<br/>Increased cleaning in between infusions,<br/>Reduced number of patients attending to allow social distancing</b></p> |
| <p><b>Q19</b> What modifications to patient assessment have you made (tick all that apply)</p>                                                                         | <p><b>Respondent skipped this question</b></p>                                                                                                                            |
| <p><b>Q20</b> Have you modified the infusion protocols (tick all that apply)</p>                                                                                       | <p><b>No – the protocols remain the same</b></p>                                                                                                                          |
| <p><b>Q21</b> How many patients have cancelled / delayed their infusion due to concern about attending and the risk of coronavirus?</p>                                | <p><b>&lt;5%</b></p>                                                                                                                                                      |
| <p><b>Q22</b> If patients have delayed / cancelled their infusions – have any had disease flare</p>                                                                    | <p><b>No: all have remained well</b></p>                                                                                                                                  |
| <p><b>Q23</b> How many patients that receive biologic infusions for IBD at your centre have tested positive for coronavirus<br/>0</p>                                  | <p><b>0</b></p>                                                                                                                                                           |

**Q24** What sources of information support are there for  
your patients

**We have always had a telephone help line / email  
address**

---

**Q25** Please list any other modifications you have made to your infusion centre in the text box below

-

---

#22

COMPLETE

**Collector:** Email Invitation 1 (Email)  
**Started:** Wednesday, April 15, 2020 5:07:35 PM  
**Last Modified:** Wednesday, April 15, 2020 5:09:49 PM  
**Time Spent:** 00:02:14  
**Email:** aananthakrishnan@mgh.harvard.edu  
**IP Address:** 98.229.122.132

Page 1: IOIBD Survey following Webinar-4 dd 10 April 2020

**Q1 A. BACKGROUND QUESTIONS (before the coronavirus pandemic)1. In which country do you practice:**

USA

**Q2 About your infusion centre:** **The infusion centre accepts patients from different specialities**

**Q3 About staffing of your infusion centre (tick all that apply)Our infusion centre is organised as follows:** **Staffed purely by general nurses to deliver infusions**

**Q4 About the location of your infusion centre (tick all that apply):** **Our infusion centre is attached to my practice / unit / hospital**

**Q5 5) How many infusions for IBD patients does your IBD centre prescribe each week** **50-100**

**Q6 What percentage of these infusions are "home infusions"** **11-30%**

**Q7 In the infusion unit, which of the following are performed (tick all that apply)** **Routine blood tests,  
Therapeutic drug levels.**

**Q8 Do you reduce the duration of infliximab infusions monitoring for patients who are stable on maintenance therapy** **Yes: reduce infusion to 60 minutes**

**Q9 Do you reduce the post infusion monitoring for patient on stable maintenance therapy** **Yes: we do not perform post infusion monitoring for stable patients**

**Q10 MODIFICATIONS INTRODUCED IN RESPONSE TO CORONAVIRUS PANDEMIC10) Have you moved the location of your infusion centre:** **No: it remains attached to my centre / practice / hospital**



|                                                                                                                                  |                                                                                                                                                       |
|----------------------------------------------------------------------------------------------------------------------------------|-------------------------------------------------------------------------------------------------------------------------------------------------------|
| <b>Q11</b> Has your infusion centre experienced a change its capacity:                                                           | <b>Yes, the capacity for infusions has reduced</b>                                                                                                    |
| <b>Q12</b> Have you changed the case mix attending the infusion centre (tick all that apply):                                    | <b>No: it has always received patients from different specialities</b>                                                                                |
| <b>Q13</b> Have you changed the staffing of the infusion centre:                                                                 | <b>No</b>                                                                                                                                             |
| <b>Q14</b> Are patients called in advance of an infusion to screen them for coronavirus symptoms:                                | <b>YES</b>                                                                                                                                            |
| <b>Q15</b> Are patients screened on arrival at the infusion centre for fever / symptoms of coronavirus:                          | <b>YES</b>                                                                                                                                            |
| <b>Q16</b> How many patients have a positive screen and require their infusion to be rescheduled:                                |                                                                                                                                                       |
| 5                                                                                                                                |                                                                                                                                                       |
| <b>Q17</b> If someone has a fever or “influenza like illness” on screening how long are you delaying their infusions for         |                                                                                                                                                       |
| 2 weeks                                                                                                                          |                                                                                                                                                       |
| <b>Q18</b> What other modifications have you implemented (tick all that apply):                                                  | <b>Increased the number of patients receiving home infusions</b><br>,<br><b>Altered the threshold for IV iron infusions to reduce patient numbers</b> |
| <b>Q19</b> What modifications to patient assessment have you made (tick all that apply)                                          | <b>Respondent skipped this question</b>                                                                                                               |
| <b>Q20</b> Have you modified the infusion protocols (tick all that apply)                                                        | <b>No – the protocols remain the same</b>                                                                                                             |
| <b>Q21</b> How many patients have cancelled / delayed their infusion due to concern about attending and the risk of coronavirus? | <b>11-20%</b>                                                                                                                                         |
| <b>Q22</b> If patients have delayed / cancelled their infusions – have any had disease flare                                     | <b>No: all have remained well</b>                                                                                                                     |
| <b>Q23</b> How many patients that receive biologic infusions for IBD at your centre have tested positive for coronavirus         |                                                                                                                                                       |
| 2                                                                                                                                |                                                                                                                                                       |

**Q24** What sources of information support are there for your patients

**We have always had a telephone help line / email address**

,

**We have produced a patient information sheet in response to coronavirus**

---

**Q25** Please list any other modifications you have made to your infusion centre in the text box below

**Respondent skipped this question**

---

#23

COMPLETE

**Collector:** Email Invitation 1 (Email)  
**Started:** Wednesday, April 15, 2020 7:44:33 PM  
**Last Modified:** Wednesday, April 15, 2020 7:54:51 PM  
**Time Spent:** 00:10:17  
**Email:** flavio@steinwurz.net  
**IP Address:** 179.208.174.23

Page 1: IOIBD Survey following Webinar-4 dd 10 April 2020

**Q1 A. BACKGROUND QUESTIONS (before the coronavirus pandemic)1. In which country do you practice:**

Brazil

**Q2 About your infusion centre:**

**The infusion centre accepts patients from different specialities**

**Q3 About staffing of your infusion centre (tick all that apply)Our infusion centre is organised as follows:**

**Staffed purely by general nurses to deliver infusions,  
Has an attending physician at least 50% of operating hours**

**Q4 About the location of your infusion centre (tick all that apply):**

**Our infusion centre is attached to my practice / unit / hospital**

**Our infusion centre is shared with other IBD centres**

**Q5 5) How many infusions for IBD patients does your IBD centre prescribe each week**

**10-50**

**Q6 What percentage of these infusions are "home infusions"**

**1-10%**

**Q7 In the infusion unit, which of the following are performed (tick all that apply)**

**Disease activity / adverse event assessment,  
Routine blood tests**

**Q8 Do you reduce the duration of infliximab infusions monitoring for patients who are stable on maintenance therapy**

**No: all infusions are 120 minutes**

**Q9 Do you reduce the post infusion monitoring for patient on stable maintenance therapy**

**Yes: we do not perform post infusion monitoring for stable patients**

**Q10** MODIFICATIONS INTRODUCED IN RESPONSE TO CORONAVIRUS PANDEMIC10) Have you moved the location of your infusion centre: **Yes: it has moved to a new location out of the medical centre in response to coronavirus**

**Q11** Has your infusion centre experienced a change its capacity: **Yes, the capacity for infusions has reduced**

**Q12** Have you changed the case mix attending the infusion centre (tick all that apply): **No: it has always received patients from different specialities**

**Q13** Have you changed the staffing of the infusion centre: **No**

**Q14** Are patients called in advance of an infusion to screen them for coronavirus symptoms: **YES**

**Q15** Are patients screened on arrival at the infusion centre for fever / symptoms of coronavirus: **YES**

**Q16** How many patients have a positive screen and require their infusion to be rescheduled:

No one yet.

**Q17** If someone has a fever or “influenza like illness” on screening how long are you delaying their infusions for

7-14 days

**Q18** What other modifications have you implemented (tick all that apply): **Increased spacing between infusion chairs, Increased cleaning in between infusions, Reduced number of patients attending to allow social distancing, , Switching patients on infusions to subcutaneous alternatives, , Altered the threshold for IV iron infusions to reduce patient numbers**

**Q19** What modifications to patient assessment have you made (tick all that apply) **Disease activity assessment / adverse events are not recorded**

**Q20** Have you modified the infusion protocols (tick all that apply)

**We have reduced monitoring post infusion for stable patients**

,

**We have switched iv premedication to oral where possible**

**Q21** How many patients have cancelled / delayed their infusion due to concern about attending and the risk of coronavirus?

**6-10%**

**Q22** If patients have delayed / cancelled their infusions – have any had disease flare

**Yes: they had infusion and responded**

**Q23** How many patients that receive biologic infusions for IBD at your centre have tested positive for coronavirus

1

**Q24** What sources of information support are there for your patients

**We have always had a telephone help line / email address**

**Q25** Please list any other modifications you have made to your infusion centre in the text box below

All already mentioned.

#24

COMPLETE

**Collector:** Email Invitation 1 (Email)  
**Started:** Wednesday, April 15, 2020 9:32:27 PM  
**Last Modified:** Wednesday, April 15, 2020 9:50:19 PM  
**Time Spent:** 00:17:51  
**Email:** anne.griffiths@sickkids.ca  
**IP Address:** 174.119.204.192

Page 1: IOIBD Survey following Webinar-4 dd 10 April 2020

**Q1 A. BACKGROUND QUESTIONS (before the coronavirus pandemic)**1. In which country do you practice:

Canada

**Q2** About your infusion centre: **The infusion centre accepts patients from different specialities**

**Q3** About staffing of your infusion centre (tick all that apply)Our infusion centre is organised as follows: **Has IBD specialist nurse input, but infusions given by general nurses**

**Q4** About the location of your infusion centre (tick all that apply): **Our infusion centre is attached to my practice / unit / hospital**,  
**Our infusion centre is located in the community**

**Q5** 5) How many infusions for IBD patients does your IBD centre prescribe each week **50-100**

**Q6** What percentage of these infusions are "home infusions" **0%**

**Q7** In the infusion unit, which of the following are performed (tick all that apply) **Disease activity / adverse event assessment,**  
**Routine blood tests,**  
**Therapeutic drug levels.**

**Q8** Do you reduce the duration of infliximab infusions monitoring for patients who are stable on maintenance therapy **No: all infusions are 120 minutes**

**Q9** Do you reduce the post infusion monitoring for patient on stable maintenance therapy **No all patients are monitored for standard time after an infusion**

|                                                                                                                                                                    |                                                                                                                                                                                                                                          |
|--------------------------------------------------------------------------------------------------------------------------------------------------------------------|------------------------------------------------------------------------------------------------------------------------------------------------------------------------------------------------------------------------------------------|
| <p><b>Q10</b> MODIFICATIONS INTRODUCED IN RESPONSE TO CORONAVIRUS PANDEMIC10) Have you moved the location of your infusion centre:</p>                             | <p><b>No: it remains in the same community setting</b></p>                                                                                                                                                                               |
| <p><b>Q11</b> Has your infusion centre experienced a change its capacity:</p>                                                                                      | <p><b>No, the capacity of infusions has remained the same</b></p>                                                                                                                                                                        |
| <p><b>Q12</b> Have you changed the case mix attending the infusion centre (tick all that apply):</p>                                                               | <p><b>No: it has always received patients from different specialities</b></p>                                                                                                                                                            |
| <p><b>Q13</b> Have you changed the staffing of the infusion centre:</p>                                                                                            | <p><b>No</b></p>                                                                                                                                                                                                                         |
| <p><b>Q14</b> Are patients called in advance of an infusion to screen them for coronavirus symptoms:</p>                                                           | <p><b>YES</b></p>                                                                                                                                                                                                                        |
| <p><b>Q15</b> Are patients screened on arrival at the infusion centre for fever / symptoms of coronavirus:</p>                                                     | <p><b>YES</b></p>                                                                                                                                                                                                                        |
| <p><b>Q16</b> How many patients have a positive screen and require their infusion to be rescheduled:<br/>0</p>                                                     |                                                                                                                                                                                                                                          |
| <p><b>Q17</b> If someone has a fever or “influenza like illness” on screening how long are you delaying their infusions for<br/>14 days from start of symptoms</p> |                                                                                                                                                                                                                                          |
| <p><b>Q18</b> What other modifications have you implemented (tick all that apply):</p>                                                                             | <p><b>Increased spacing between infusion chairs,<br/>Increased cleaning in between infusions,<br/>Reduced number of patients attending to allow social distancing<br/>,<br/>Increased in hours of operation to maintain capacity</b></p> |
| <p><b>Q19</b> What modifications to patient assessment have you made (tick all that apply)</p>                                                                     | <p><b>Respondent skipped this question</b></p>                                                                                                                                                                                           |
| <p><b>Q20</b> Have you modified the infusion protocols (tick all that apply)</p>                                                                                   | <p><b>We have reduced monitoring post infusion for stable patients</b></p>                                                                                                                                                               |
| <p><b>Q21</b> How many patients have cancelled / delayed their infusion due to concern about attending and the risk of coronavirus?</p>                            | <p><b>&lt;5%</b></p>                                                                                                                                                                                                                     |

**Q22** If patients have delayed / cancelled their infusions – have any had disease flare **Yes: they had infusion and responded**

---

**Q23** How many patients that receive biologic infusions for IBD at your centre have tested positive for coronavirus

none

---

**Q24** What sources of information support are there for your patients

**We have always had a telephone help line / email address**

,

**We have produced a patient information sheet in response to coronavirus**

---

**Q25** Please list any other modifications you have made to your infusion centre in the text box below

Private infusions allowed for patients on steroids (>20 mg daily or comparable per kg dose for younger patients) Crohn's and Colitis Canada has had a rigorous weekly webinar (well attended) giving patients advice about COVID Organized by Gil Kaplan!

---



#25

COMPLETE

**Collector:** Email Invitation 1 (Email)  
**Started:** Thursday, April 16, 2020 3:06:39 AM  
**Last Modified:** Thursday, April 16, 2020 3:10:51 AM  
**Time Spent:** 00:04:12  
**Email:** loftus.edward@mayo.edu  
**IP Address:** 129.176.151.28

Page 1: IOIBD Survey following Webinar-4 dd 10 April 2020

**Q1 A. BACKGROUND QUESTIONS (before the coronavirus pandemic)**1. In which country do you practice:

USA

**Q2** About your infusion centre: **The infusion centre accepts patients from different specialities**

**Q3** About staffing of your infusion centre (tick all that apply)Our infusion centre is organised as follows: **Staffed purely by general nurses to deliver infusions**

**Q4** About the location of your infusion centre (tick all that apply): **Our infusion centre is attached to my practice / unit / hospital**

**Q5** 5) How many infusions for IBD patients does your IBD centre prescribe each week **50-100**

**Q6** What percentage of these infusions are "home infusions" **11-30%**

**Q7** In the infusion unit, which of the following are performed (tick all that apply) **Routine blood tests,  
Therapeutic drug levels.**

**Q8** Do you reduce the duration of infliximab infusions monitoring for patients who are stable on maintenance therapy **Yes: reduce infusion to 60 minutes**

**Q9** Do you reduce the post infusion monitoring for patient on stable maintenance therapy **Yes: post infusion monitoring is reduced**

**Q10** MODIFICATIONS INTRODUCED IN RESPONSE TO CORONAVIRUS PANDEMIC10) Have you moved the location of your infusion centre: **No: it remains attached to my centre / practice / hospital**

|                                                                                                                                                        |                                                                                                                                                                    |
|--------------------------------------------------------------------------------------------------------------------------------------------------------|--------------------------------------------------------------------------------------------------------------------------------------------------------------------|
| <b>Q11</b> Has your infusion centre experienced a change its capacity:                                                                                 | <b>No, the capacity of infusions has remained the same</b>                                                                                                         |
| <b>Q12</b> Have you changed the case mix attending the infusion centre (tick all that apply):                                                          | <b>No: it has always received patients from different specialities</b>                                                                                             |
| <b>Q13</b> Have you changed the staffing of the infusion centre:                                                                                       | <b>No</b>                                                                                                                                                          |
| <b>Q14</b> Are patients called in advance of an infusion to screen them for coronavirus symptoms:                                                      | <b>YES</b>                                                                                                                                                         |
| <b>Q15</b> Are patients screened on arrival at the infusion centre for fever / symptoms of coronavirus:                                                | <b>YES</b>                                                                                                                                                         |
| <b>Q16</b> How many patients have a positive screen and require their infusion to be rescheduled:<br>don't have exact numbers, but very few            |                                                                                                                                                                    |
| <b>Q17</b> If someone has a fever or "influenza like illness" on screening how long are you delaying their infusions for<br>at least a couple of weeks |                                                                                                                                                                    |
| <b>Q18</b> What other modifications have you implemented (tick all that apply):                                                                        | <b>Increased spacing between infusion chairs,<br/>Increased cleaning in between infusions,<br/>Reduced number of patients attending to allow social distancing</b> |
| <b>Q19</b> What modifications to patient assessment have you made (tick all that apply)                                                                | <b>Respondent skipped this question</b>                                                                                                                            |
| <b>Q20</b> Have you modified the infusion protocols (tick all that apply)                                                                              | <b>No – the protocols remain the same</b>                                                                                                                          |
| <b>Q21</b> How many patients have cancelled / delayed their infusion due to concern about attending and the risk of coronavirus?                       | <b>6-10%</b>                                                                                                                                                       |
| <b>Q22</b> If patients have delayed / cancelled their infusions – have any had disease flare                                                           | <b>Yes: they had infusion and responded</b>                                                                                                                        |
| <b>Q23</b> How many patients that receive biologic infusions for IBD at your centre have tested positive for coronavirus<br>very few if any            |                                                                                                                                                                    |

**Q24** What sources of information support are there for your patients

**We have always had a telephone help line / email address**

,

**We have produced a patient information sheet in response to coronavirus**

---

**Q25** Please list any other modifications you have made to your infusion centre in the text box below

**Respondent skipped this question**

---

#26

COMPLETE

**Collector:** Email Invitation 1 (Email)  
**Started:** Wednesday, April 15, 2020 6:05:03 PM  
**Last Modified:** Thursday, April 16, 2020 11:36:20 AM  
**Time Spent:** 17:31:17  
**Email:** colmomorain@gmail.com  
**IP Address:** 46.7.101.226

Page 1: IOIBD Survey following Webinar-4 dd 10 April 2020

**Q1 A. BACKGROUND QUESTIONS (before the coronavirus pandemic)1. In which country do you practice:**

Ireland

**Q2 About your infusion centre:** **The infusion centre accepts patients from different specialities**

**Q3 About staffing of your infusion centre (tick all that apply)Our infusion centre is organised as follows:** **Has IBD specialist nurse input, but infusions given by general nurses**

**Q4 About the location of your infusion centre (tick all that apply):** **Our infusion centre is attached to my practice / unit / hospital**

**Q5 5) How many infusions for IBD patients does your IBD centre prescribe each week** **10-50**

**Q6 What percentage of these infusions are "home infusions"** **0%**

**Q7 In the infusion unit, which of the following are performed (tick all that apply)** **Disease activity / adverse event assessment, Routine blood tests, Therapeutic drug levels.**

**Q8 Do you reduce the duration of infliximab infusions monitoring for patients who are stable on maintenance therapy** **Yes: reduce infusion to 60 minutes**

**Q9 Do you reduce the post infusion monitoring for patient on stable maintenance therapy** **Yes: post infusion monitoring is reduced**

**Q10 MODIFICATIONS INTRODUCED IN RESPONSE TO CORONAVIRUS PANDEMIC10) Have you moved the location of your infusion centre:** **No: it remains in the same community setting**

|                                                                                                                                                                 |                                                                                                                                                                                                                                                                                                                                                                                                                                                                           |
|-----------------------------------------------------------------------------------------------------------------------------------------------------------------|---------------------------------------------------------------------------------------------------------------------------------------------------------------------------------------------------------------------------------------------------------------------------------------------------------------------------------------------------------------------------------------------------------------------------------------------------------------------------|
| <p><b>Q11</b> Has your infusion centre experienced a change its capacity:</p>                                                                                   | <p><b>Yes, the capacity for infusions has reduced</b></p>                                                                                                                                                                                                                                                                                                                                                                                                                 |
| <p><b>Q12</b> Have you changed the case mix attending the infusion centre (tick all that apply):</p>                                                            | <p><b>No: it has always received patients from different specialities</b></p>                                                                                                                                                                                                                                                                                                                                                                                             |
| <p><b>Q13</b> Have you changed the staffing of the infusion centre:</p>                                                                                         | <p><b>No</b></p>                                                                                                                                                                                                                                                                                                                                                                                                                                                          |
| <p><b>Q14</b> Are patients called in advance of an infusion to screen them for coronavirus symptoms:</p>                                                        | <p><b>YES</b></p>                                                                                                                                                                                                                                                                                                                                                                                                                                                         |
| <p><b>Q15</b> Are patients screened on arrival at the infusion centre for fever / symptoms of coronavirus:</p>                                                  | <p><b>YES</b></p>                                                                                                                                                                                                                                                                                                                                                                                                                                                         |
| <p><b>Q16</b> How many patients have a positive screen and require their infusion to be rescheduled:<br/><br/>none</p>                                          |                                                                                                                                                                                                                                                                                                                                                                                                                                                                           |
| <p><b>Q17</b> If someone has a fever or “influenza like illness” on screening how long are you delaying their infusions for one week after symptoms resolve</p> |                                                                                                                                                                                                                                                                                                                                                                                                                                                                           |
| <p><b>Q18</b> What other modifications have you implemented (tick all that apply):</p>                                                                          | <p><b>Increased spacing between infusion chairs,</b><br/><b>Increased cleaning in between infusions,</b><br/><b>Reduced number of patients attending to allow social distancing</b><br/>,<br/><b>Switching patients on infusions to subcutaneous alternatives</b><br/>,<br/><b>Increased the duration between infusions in response to coronavirus (ie from 8 to 10 weeks)</b><br/>,<br/><b>Altered the threshold for IV iron infusions to reduce patient numbers</b></p> |
| <p><b>Q19</b> What modifications to patient assessment have you made (tick all that apply)</p>                                                                  | <p><b>Respondent skipped this question</b></p>                                                                                                                                                                                                                                                                                                                                                                                                                            |
| <p><b>Q20</b> Have you modified the infusion protocols (tick all that apply)</p>                                                                                | <p><b>Respondent skipped this question</b></p>                                                                                                                                                                                                                                                                                                                                                                                                                            |

**Q21** How many patients have cancelled / delayed their infusion due to concern about attending and the risk of coronavirus? **6-10%**

---

**Q22** If patients have delayed / cancelled their infusions – have any had disease flare **Yes: they had infusion and responded**

---

**Q23** How many patients that receive biologic infusions for IBD at your centre have tested positive for coronavirus  
None

---

**Q24** What sources of information support are there for your patients **We have always had a telephone help line / email address**

---

**Q25** Please list any other modifications you have made to your infusion centre in the text box below  
All modifications have been included in the questions above

---

#27

COMPLETE

**Collector:** Email Invitation 1 (Email)  
**Started:** Thursday, April 16, 2020 1:26:35 PM  
**Last Modified:** Thursday, April 16, 2020 1:26:56 PM  
**Time Spent:** 00:00:21  
**Email:** axel.dignass@fdk.info  
**IP Address:** 87.144.241.8

Page 1: IOIBD Survey following Webinar-4 dd 10 April 2020

**Q1 A. BACKGROUND QUESTIONS (before the coronavirus pandemic)**1. In which country do you practice:

Germany

**Q2** About your infusion centre: **The infusion centre is dedicated to patients with IBD**

**Q3** About staffing of your infusion centre (tick all that apply)Our infusion centre is organised as follows: **Has IBD specialist nurse input, but infusions given by general nurses**  
,  
**Has an attending physician at least 50% of operating hours**

**Q4** About the location of your infusion centre (tick all that apply): **Our infusion centre is attached to my practice / unit / hospital**

**Q5** 5) How many infusions for IBD patients does your IBD centre prescribe each week **50-100**

**Q6** What percentage of these infusions are "home infusions" **0%**

**Q7** In the infusion unit, which of the following are performed (tick all that apply) **Disease activity / adverse event assessment,**  
**Routine blood tests,**  
**Therapeutic drug levels.**

**Q8** Do you reduce the duration of infliximab infusions monitoring for patients who are stable on maintenance therapy **Yes: reduce infusion to 60 minutes**

**Q9** Do you reduce the post infusion monitoring for patient on stable maintenance therapy **Yes: we do not perform post infusion monitoring for stable patients**

|                                                                                                                                                                                                            |                                                                                                                                                                                                          |
|------------------------------------------------------------------------------------------------------------------------------------------------------------------------------------------------------------|----------------------------------------------------------------------------------------------------------------------------------------------------------------------------------------------------------|
| <p><b>Q10</b> MODIFICATIONS INTRODUCED IN RESPONSE TO CORONAVIRUS PANDEMIC10) Have you moved the location of your infusion centre:</p>                                                                     | <p><b>No: it remains attached to my centre / practice / hospital</b></p>                                                                                                                                 |
| <p><b>Q11</b> Has your infusion centre experienced a change its capacity:</p>                                                                                                                              | <p><b>No, the capacity of infusions has remained the same</b></p>                                                                                                                                        |
| <p><b>Q12</b> Have you changed the case mix attending the infusion centre (tick all that apply):</p>                                                                                                       | <p><b>No: it remains limited to IBD patients only</b></p>                                                                                                                                                |
| <p><b>Q13</b> Have you changed the staffing of the infusion centre:</p>                                                                                                                                    | <p><b>No</b></p>                                                                                                                                                                                         |
| <p><b>Q14</b> Are patients called in advance of an infusion to screen them for coronavirus symptoms:</p>                                                                                                   | <p><b>YES</b></p>                                                                                                                                                                                        |
| <p><b>Q15</b> Are patients screened on arrival at the infusion centre for fever / symptoms of coronavirus:</p>                                                                                             | <p><b>YES</b></p>                                                                                                                                                                                        |
| <p><b>Q16</b> How many patients have a positive screen and require their infusion to be rescheduled:<br/><br/>&lt;10%</p>                                                                                  |                                                                                                                                                                                                          |
| <p><b>Q17</b> If someone has a fever or “influenza like illness” on screening how long are you delaying their infusions for two negative Sars-CoV2 tests within 48 hours or if very stable max 14 days</p> |                                                                                                                                                                                                          |
| <p><b>Q18</b> What other modifications have you implemented (tick all that apply):</p>                                                                                                                     | <p><b>Increased spacing between infusion chairs,<br/>Increased cleaning in between infusions,<br/>Increased in hours of operation to maintain capacity</b></p>                                           |
| <p><b>Q19</b> What modifications to patient assessment have you made (tick all that apply)</p>                                                                                                             | <p><b>Drug levels are not taken</b></p>                                                                                                                                                                  |
| <p><b>Q20</b> Have you modified the infusion protocols (tick all that apply)</p>                                                                                                                           | <p><b>We have reduced infusion duration for stable patients,<br/>We have reduced monitoring post infusion for stable patients<br/>,<br/>We have switched iv premedication to oral where possible</b></p> |
| <p><b>Q21</b> How many patients have cancelled / delayed their infusion due to concern about attending and the risk of coronavirus?</p>                                                                    | <p><b>6-10%</b></p>                                                                                                                                                                                      |



**Q22** If patients have delayed / cancelled their infusions – have any had disease flare **Yes: they had infusion and responded**

---

**Q23** How many patients that receive biologic infusions for IBD at your centre have tested positive for coronavirus

0

---

**Q24** What sources of information support are there for your patients

**We have always had a telephone help line / email address**

,

**We have produced a patient information sheet in response to coronavirus**

---

**Q25** Please list any other modifications you have made to your infusion centre in the text box below

**Respondent skipped this question**

---

#28

COMPLETE

**Collector:** Email Invitation 1 (Email)  
**Started:** Thursday, April 16, 2020 2:44:35 PM  
**Last Modified:** Thursday, April 16, 2020 3:09:10 PM  
**Time Spent:** 00:24:35  
**Email:** zhihuan@vip.163.com  
**IP Address:** 45.135.186.30

Page 1: IOIBD Survey following Webinar-4 dd 10 April 2020

**Q1 A. BACKGROUND QUESTIONS (before the coronavirus pandemic)1. In which country do you practice:**

China

**Q2 About your infusion centre:** **The infusion centre is dedicated to patients with IBD**

**Q3 About staffing of your infusion centre (tick all that apply)Our infusion centre is organised as follows:** **Has IBD specialist nurse input, but infusions given by general nurses**

**Q4 About the location of your infusion centre (tick all that apply):** **Our infusion centre is attached to my practice / unit / hospital**

**Q5 5) How many infusions for IBD patients does your IBD centre prescribe each week** **10-50**

**Q6 What percentage of these infusions are “home infusions”** **0%**

**Q7 In the infusion unit, which of the following are performed (tick all that apply)** **Disease activity / adverse event assessment, Routine blood tests, Therapeutic drug levels.**

**Q8 Do you reduce the duration of infliximab infusions monitoring for patients who are stable on maintenance therapy** **No: all infusions are 120 minutes**

**Q9 Do you reduce the post infusion monitoring for patient on stable maintenance therapy** **No all patients are monitored for standard time after an infusion**

**Q10 MODIFICATIONS INTRODUCED IN RESPONSE TO CORONAVIRUS PANDEMIC10) Have you moved the location of your infusion centre:** **No: it remains attached to my centre / practice / hospital**

|                                                                                                                                                                               |                                                                                                                                                                                                                                                                                                                                                                    |
|-------------------------------------------------------------------------------------------------------------------------------------------------------------------------------|--------------------------------------------------------------------------------------------------------------------------------------------------------------------------------------------------------------------------------------------------------------------------------------------------------------------------------------------------------------------|
| <b>Q11</b> Has your infusion centre experienced a change its capacity:                                                                                                        | <b>Yes, the capacity for infusions has reduced</b>                                                                                                                                                                                                                                                                                                                 |
| <b>Q12</b> Have you changed the case mix attending the infusion centre (tick all that apply):                                                                                 | <b>No: it remains limited to IBD patients only</b>                                                                                                                                                                                                                                                                                                                 |
| <b>Q13</b> Have you changed the staffing of the infusion centre:                                                                                                              | <b>No</b>                                                                                                                                                                                                                                                                                                                                                          |
| <b>Q14</b> Are patients called in advance of an infusion to screen them for coronavirus symptoms:                                                                             | <b>YES</b>                                                                                                                                                                                                                                                                                                                                                         |
| <b>Q15</b> Are patients screened on arrival at the infusion centre for fever / symptoms of coronavirus:                                                                       | <b>YES</b>                                                                                                                                                                                                                                                                                                                                                         |
| <b>Q16</b> How many patients have a positive screen and require their infusion to be rescheduled:<br><br>No one                                                               |                                                                                                                                                                                                                                                                                                                                                                    |
| <b>Q17</b> If someone has a fever or "influenza like illness" on screening how long are you delaying their infusions for<br><br>At least one week after symptoms are relieved |                                                                                                                                                                                                                                                                                                                                                                    |
| <b>Q18</b> What other modifications have you implemented (tick all that apply):                                                                                               | <b>Increased cleaning in between infusions,<br/>Reduced number of patients attending to allow social distancing<br/>,<br/>Switching patients on infusions to subcutaneous alternatives<br/>,<br/>Increased the duration between infusions in response to coronavirus (ie from 8 to 10 weeks)<br/>,<br/>Reduced the number of patients receiving home infusions</b> |
| <b>Q19</b> What modifications to patient assessment have you made (tick all that apply)                                                                                       | <b>Drug levels are not taken</b>                                                                                                                                                                                                                                                                                                                                   |
| <b>Q20</b> Have you modified the infusion protocols (tick all that apply)                                                                                                     | <b>No – the protocols remain the same</b>                                                                                                                                                                                                                                                                                                                          |
| <b>Q21</b> How many patients have cancelled / delayed their infusion due to concern about attending and the risk of coronavirus?                                              | <b>20-50%</b>                                                                                                                                                                                                                                                                                                                                                      |

**Q22** If patients have delayed / cancelled their infusions – have any had disease flare **Yes: they had infusion and responded**

---

**Q23** How many patients that receive biologic infusions for IBD at your centre have tested positive for coronavirus

No one

---

**Q24** What sources of information support are there for your patients **We have always had a telephone help line / email address**

---

**Q25** Please list any other modifications you have made to your infusion centre in the text box below

None

---

#29

COMPLETE

**Collector:** Email Invitation 1 (Email)  
**Started:** Thursday, April 16, 2020 3:04:02 PM  
**Last Modified:** Thursday, April 16, 2020 3:11:43 PM  
**Time Spent:** 00:07:41  
**Email:** pia.munkholm@regionh.dk  
**IP Address:** 128.0.73.7

Page 1: IOIBD Survey following Webinar-4 dd 10 April 2020

**Q1 A. BACKGROUND QUESTIONS (before the coronavirus pandemic)**1. In which country do you practice:

denmark

**Q2** About your infusion centre:

**The infusion centre is dedicated to patients with IBD**

**Q3** About staffing of your infusion centre (tick all that apply)Our infusion centre is organised as follows:

**Staffed purely by IBD specialist nurses,**  
**Staffed purely by general nurses to deliver infusions,**  
**Has an attending physician at least 50% of operating hours**

**Q4** About the location of your infusion centre (tick all that apply):

**Our infusion centre is attached to my practice / unit / hospital**

**Q5** 5) How many infusions for IBD patients does your IBD centre prescribe each week

**50-100**

**Q6** What percentage of these infusions are "home infusions"

**0%**

**Q7** In the infusion unit, which of the following are performed (tick all that apply)

**Disease activity / adverse event assessment,**  
**Routine blood tests**

**Q8** Do you reduce the duration of infliximab infusions monitoring for patients who are stable on maintenance therapy

**Yes: reduce infusion to 60 minutes**

**Q9** Do you reduce the post infusion monitoring for patient on stable maintenance therapy

**Yes: we do not perform post infusion monitoring for stable patients**

|                                                                                                                                             |                                                                                                                                                                                                                                                                                                                                                                                            |
|---------------------------------------------------------------------------------------------------------------------------------------------|--------------------------------------------------------------------------------------------------------------------------------------------------------------------------------------------------------------------------------------------------------------------------------------------------------------------------------------------------------------------------------------------|
| <p><b>Q10</b> MODIFICATIONS INTRODUCED IN RESPONSE TO CORONAVIRUS PANDEMIC10) Have you moved the location of your infusion centre:</p>      | <p><b>No: it remains attached to my centre / practice / hospital</b></p>                                                                                                                                                                                                                                                                                                                   |
| <p><b>Q11</b> Has your infusion centre experienced a change its capacity:</p>                                                               | <p><b>No, the capacity of infusions has remained the same</b></p>                                                                                                                                                                                                                                                                                                                          |
| <p><b>Q12</b> Have you changed the case mix attending the infusion centre (tick all that apply):</p>                                        | <p><b>No: it remains limited to IBD patients only</b></p>                                                                                                                                                                                                                                                                                                                                  |
| <p><b>Q13</b> Have you changed the staffing of the infusion centre:</p>                                                                     | <p><b>No</b></p>                                                                                                                                                                                                                                                                                                                                                                           |
| <p><b>Q14</b> Are patients called in advance of an infusion to screen them for coronavirus symptoms:</p>                                    | <p><b>YES</b></p>                                                                                                                                                                                                                                                                                                                                                                          |
| <p><b>Q15</b> Are patients screened on arrival at the infusion centre for fever / symptoms of coronavirus:</p>                              | <p><b>YES</b></p>                                                                                                                                                                                                                                                                                                                                                                          |
| <p><b>Q16</b> How many patients have a positive screen and require their infusion to be rescheduled:<br/>2</p>                              |                                                                                                                                                                                                                                                                                                                                                                                            |
| <p><b>Q17</b> If someone has a fever or “influenza like illness” on screening how long are you delaying their infusions for<br/>2 weeks</p> |                                                                                                                                                                                                                                                                                                                                                                                            |
| <p><b>Q18</b> What other modifications have you implemented (tick all that apply):</p>                                                      | <p><b>Increased spacing between infusion chairs,<br/>Increased cleaning in between infusions,<br/>Reduced number of patients attending to allow social distancing<br/>,<br/>Increased in hours of operation to maintain capacity,<br/>Switching patients on infusions to subcutaneous alternatives<br/>,<br/>Altered the threshold for IV iron infusions to reduce patient numbers</b></p> |
| <p><b>Q19</b> What modifications to patient assessment have you made (tick all that apply)</p>                                              | <p><b>Respondent skipped this question</b></p>                                                                                                                                                                                                                                                                                                                                             |
| <p><b>Q20</b> Have you modified the infusion protocols (tick all that apply)</p>                                                            | <p><b>No – the protocols remain the same</b></p>                                                                                                                                                                                                                                                                                                                                           |

**Q21** How many patients have cancelled / delayed their infusion due to concern about attending and the risk of coronavirus? <5%

---

**Q22** If patients have delayed / cancelled their infusions – have any had disease flare **No: all have remained well**

---

**Q23** How many patients that receive biologic infusions for IBD at your centre have tested positive for coronavirus  
2

---

**Q24** What sources of information support are there for your patients

**We have always had a telephone help line / email address**

,

**We have set up a telephone help line / email address in response to coronavirus**

---

**Q25** Please list any other modifications you have made to your infusion centre in the text box below

telemedicin Constant-Care APP has now been added tick boxes about Sars Cov2 and Covid19

---

# #30

**COMPLETE**

**Collector:** Email Invitation 1 (Email)  
**Started:** Thursday, April 16, 2020 5:24:30 PM  
**Last Modified:** Thursday, April 16, 2020 5:33:06 PM  
**Time Spent:** 00:08:35  
**Email:** fernandomagro65@gmail.com  
**IP Address:** 193.136.35.43

Page 1: IOIBD Survey following Webinar-4 dd 10 April 2020

**Q1 A. BACKGROUND QUESTIONS (before the coronavirus pandemic)1. In which country do you practice:**

Portugal

**Q2 About your infusion centre:**

**The infusion centre accepts patients from different specialities**

**Q3 About staffing of your infusion centre (tick all that apply)Our infusion centre is organised as follows:**

**Staffed purely by general nurses to deliver infusions**

**Q4 About the location of your infusion centre (tick all that apply):**

**Our infusion centre is attached to my practice / unit / hospital**

**Q5 5) How many infusions for IBD patients does your IBD centre prescribe each week**

**100-200**

**Q6 What percentage of these infusions are "home infusions"**

**0%**

**Q7 In the infusion unit, which of the following are performed (tick all that apply)**

**Disease activity / adverse event assessment,  
 Routine blood tests,  
 Therapeutic drug levels.**

**Q8 Do you reduce the duration of infliximab infusions monitoring for patients who are stable on maintenance therapy**

**No: all infusions are 120 minutes**

**Q9 Do you reduce the post infusion monitoring for patient on stable maintenance therapy**

**Yes: post infusion monitoring is reduced**

**Q10 MODIFICATIONS INTRODUCED IN RESPONSE TO CORONAVIRUS PANDEMIC10) Have you moved the location of your infusion centre:**

**No: it remains attached to my centre / practice / hospital**



|                                                                                                                                             |                                                                                                                                                                                                                                                                                                                     |
|---------------------------------------------------------------------------------------------------------------------------------------------|---------------------------------------------------------------------------------------------------------------------------------------------------------------------------------------------------------------------------------------------------------------------------------------------------------------------|
| <p><b>Q11</b> Has your infusion centre experienced a change its capacity:</p>                                                               | <p><b>Yes, the capacity for infusions has reduced</b></p>                                                                                                                                                                                                                                                           |
| <p><b>Q12</b> Have you changed the case mix attending the infusion centre (tick all that apply):</p>                                        | <p><b>No: it has always received patients from different specialities</b></p>                                                                                                                                                                                                                                       |
| <p><b>Q13</b> Have you changed the staffing of the infusion centre:</p>                                                                     | <p><b>No</b></p>                                                                                                                                                                                                                                                                                                    |
| <p><b>Q14</b> Are patients called in advance of an infusion to screen them for coronavirus symptoms:</p>                                    | <p><b>YES</b></p>                                                                                                                                                                                                                                                                                                   |
| <p><b>Q15</b> Are patients screened on arrival at the infusion centre for fever / symptoms of coronavirus:</p>                              | <p><b>YES</b></p>                                                                                                                                                                                                                                                                                                   |
| <p><b>Q16</b> How many patients have a positive screen and require their infusion to be rescheduled:<br/><br/>1%</p>                        |                                                                                                                                                                                                                                                                                                                     |
| <p><b>Q17</b> If someone has a fever or “influenza like illness” on screening how long are you delaying their infusions for<br/><br/>15</p> |                                                                                                                                                                                                                                                                                                                     |
| <p><b>Q18</b> What other modifications have you implemented (tick all that apply):</p>                                                      | <p><b>Increased spacing between infusion chairs,<br/>Increased cleaning in between infusions,<br/>Reduced number of patients attending to allow social distancing<br/>,<br/>Increased in hours of operation to maintain capacity,<br/>Altered the threshold for IV iron infusions to reduce patient numbers</b></p> |
| <p><b>Q19</b> What modifications to patient assessment have you made (tick all that apply)</p>                                              | <p><b>Disease activity assessment / adverse events are not recorded</b></p>                                                                                                                                                                                                                                         |
| <p><b>Q20</b> Have you modified the infusion protocols (tick all that apply)</p>                                                            | <p><b>We have reduced monitoring post infusion for stable patients</b></p>                                                                                                                                                                                                                                          |
| <p><b>Q21</b> How many patients have cancelled / delayed their infusion due to concern about attending and the risk of coronavirus?</p>     | <p><b>&lt;5%</b></p>                                                                                                                                                                                                                                                                                                |
| <p><b>Q22</b> If patients have delayed / cancelled their infusions – have any had disease flare</p>                                         | <p><b>No: all have remained well</b></p>                                                                                                                                                                                                                                                                            |

**Q23** How many patients that receive biologic infusions for IBD at your centre have tested positive for coronavirus

1%

---

**Q24** What sources of information support are there for your patients

**We have always had a telephone help line / email address**

---

**Q25** Please list any other modifications you have made to your infusion centre in the text box below

**Respondent skipped this question**

---

#31

COMPLETE

**Collector:** Email Invitation 1 (Email)  
**Started:** Thursday, April 16, 2020 8:47:28 PM  
**Last Modified:** Thursday, April 16, 2020 8:51:46 PM  
**Time Spent:** 00:04:17  
**Email:** mark.silverberg@sinaihealthsystem.ca  
**IP Address:** 99.240.78.239

Page 1: IOIBD Survey following Webinar-4 dd 10 April 2020

**Q1 A. BACKGROUND QUESTIONS (before the coronavirus pandemic)**1. In which country do you practice:

Canada

**Q2** About your infusion centre: **The infusion centre accepts patients from different specialities**

**Q3** About staffing of your infusion centre (tick all that apply)Our infusion centre is organised as follows: **Staffed purely by general nurses to deliver infusions, Has an attending physician at least 50% of operating hours**

**Q4** About the location of your infusion centre (tick all that apply): **Our infusion centre is attached to my practice / unit / hospital , Our infusion centre is located in the community, Our infusion centre is shared with other IBD centres**

**Q5** 5) How many infusions for IBD patients does your IBD centre prescribe each week **10-50**

**Q6** What percentage of these infusions are "home infusions" **0%**

**Q7** In the infusion unit, which of the following are performed (tick all that apply) **Disease activity / adverse event assessment, Routine blood tests, Therapeutic drug levels.**

**Q8** Do you reduce the duration of infliximab infusions monitoring for patients who are stable on maintenance therapy **Yes: reduce infusion to 60 minutes**

|                                                                                                                                                                                                   |                                                                                                                                                                           |
|---------------------------------------------------------------------------------------------------------------------------------------------------------------------------------------------------|---------------------------------------------------------------------------------------------------------------------------------------------------------------------------|
| <p><b>Q9</b> Do you reduce the post infusion monitoring for patient on stable maintenance therapy</p>                                                                                             | <p><b>Yes: we do not perform post infusion monitoring for stable patients</b></p>                                                                                         |
| <p><b>Q10</b> MODIFICATIONS INTRODUCED IN RESPONSE TO CORONAVIRUS PANDEMIC10) Have you moved the location of your infusion centre:</p>                                                            | <p><b>No: it remains attached to my centre / practice / hospital</b></p>                                                                                                  |
| <p><b>Q11</b> Has your infusion centre experienced a change its capacity:</p>                                                                                                                     | <p><b>Yes, the capacity for infusions has reduced</b></p>                                                                                                                 |
| <p><b>Q12</b> Have you changed the case mix attending the infusion centre (tick all that apply):</p>                                                                                              | <p><b>No: it has always received patients from different specialities</b></p>                                                                                             |
| <p><b>Q13</b> Have you changed the staffing of the infusion centre:</p>                                                                                                                           | <p><b>No</b></p>                                                                                                                                                          |
| <p><b>Q14</b> Are patients called in advance of an infusion to screen them for coronavirus symptoms:</p>                                                                                          | <p><b>YES</b></p>                                                                                                                                                         |
| <p><b>Q15</b> Are patients screened on arrival at the infusion centre for fever / symptoms of coronavirus:</p>                                                                                    | <p><b>YES</b></p>                                                                                                                                                         |
| <p><b>Q16</b> How many patients have a positive screen and require their infusion to be rescheduled:<br/><br/>Many rescheduled but not documented with positive test. Based on symptoms only.</p> |                                                                                                                                                                           |
| <p><b>Q17</b> If someone has a fever or “influenza like illness” on screening how long are you delaying their infusions for<br/><br/>Until symptoms resolved for 72 hours</p>                     |                                                                                                                                                                           |
| <p><b>Q18</b> What other modifications have you implemented (tick all that apply):</p>                                                                                                            | <p><b>Increased spacing between infusion chairs,<br/>Increased cleaning in between infusions,<br/>Reduced number of patients attending to allow social distancing</b></p> |
| <p><b>Q19</b> What modifications to patient assessment have you made (tick all that apply)</p>                                                                                                    | <p><b>Respondent skipped this question</b></p>                                                                                                                            |
| <p><b>Q20</b> Have you modified the infusion protocols (tick all that apply)</p>                                                                                                                  | <p><b>No – the protocols remain the same</b></p>                                                                                                                          |
| <p><b>Q21</b> How many patients have cancelled / delayed their infusion due to concern about attending and the risk of coronavirus?</p>                                                           | <p><b>&lt;5%</b></p>                                                                                                                                                      |

**Q22** If patients have delayed / cancelled their infusions – have any had disease flare **No: all have remained well**

---

**Q23** How many patients that receive biologic infusions for IBD at your centre have tested positive for coronavirus

1

---

**Q24** What sources of information support are there for your patients **Respondent skipped this question**

---

**Q25** Please list any other modifications you have made to your infusion centre in the text box below **Respondent skipped this question**

---

## #32

COMPLETE

**Collector:** Email Invitation 1 (Email)  
**Started:** Friday, April 17, 2020 3:39:13 AM  
**Last Modified:** Friday, April 17, 2020 3:45:45 AM  
**Time Spent:** 00:06:31  
**Email:** mabreu1@med.miami.edu  
**IP Address:** 162.232.101.158

Page 1: IOIBD Survey following Webinar-4 dd 10 April 2020

**Q1 A. BACKGROUND QUESTIONS (before the coronavirus pandemic)1. In which country do you practice:**

United States

**Q2 About your infusion centre:** **The infusion centre is dedicated to patients with IBD**

**Q3 About staffing of your infusion centre (tick all that apply)Our infusion centre is organised as follows:** **Staffed purely by IBD specialist nurses, Has an attending physician at least 50% of operating hours**

**Q4 About the location of your infusion centre (tick all that apply):** **Our infusion centre is attached to my practice / unit / hospital**

**Q5 5) How many infusions for IBD patients does your IBD centre prescribe each week** **100-200**

**Q6 What percentage of these infusions are "home infusions"** **31% to 50%**

**Q7 In the infusion unit, which of the following are performed (tick all that apply)** **Disease activity / adverse event assessment, Routine blood tests, Therapeutic drug levels.**

**Q8 Do you reduce the duration of infliximab infusions monitoring for patients who are stable on maintenance therapy** **Yes: reduce infusion to 60 minutes**

**Q9 Do you reduce the post infusion monitoring for patient on stable maintenance therapy** **Yes: we do not perform post infusion monitoring for stable patients**

|                                                                                                                                                  |                                                                                                                                                                                                                                                                             |
|--------------------------------------------------------------------------------------------------------------------------------------------------|-----------------------------------------------------------------------------------------------------------------------------------------------------------------------------------------------------------------------------------------------------------------------------|
| <p><b>Q10</b> MODIFICATIONS INTRODUCED IN RESPONSE TO CORONAVIRUS PANDEMIC10) Have you moved the location of your infusion centre:</p>           | <p><b>No: it remains attached to my centre / practice / hospital</b></p>                                                                                                                                                                                                    |
| <p><b>Q11</b> Has your infusion centre experienced a change its capacity:</p>                                                                    | <p><b>No, the capacity of infusions has remained the same</b></p>                                                                                                                                                                                                           |
| <p><b>Q12</b> Have you changed the case mix attending the infusion centre (tick all that apply):</p>                                             | <p><b>No: it remains limited to IBD patients only</b></p>                                                                                                                                                                                                                   |
| <p><b>Q13</b> Have you changed the staffing of the infusion centre:</p>                                                                          | <p><b>No</b></p>                                                                                                                                                                                                                                                            |
| <p><b>Q14</b> Are patients called in advance of an infusion to screen them for coronavirus symptoms:</p>                                         | <p><b>YES</b></p>                                                                                                                                                                                                                                                           |
| <p><b>Q15</b> Are patients screened on arrival at the infusion centre for fever / symptoms of coronavirus:</p>                                   | <p><b>YES</b></p>                                                                                                                                                                                                                                                           |
| <p><b>Q16</b> How many patients have a positive screen and require their infusion to be rescheduled:<br/><br/>0 so far</p>                       |                                                                                                                                                                                                                                                                             |
| <p><b>Q17</b> If someone has a fever or “influenza like illness” on screening how long are you delaying their infusions for<br/><br/>2 weeks</p> |                                                                                                                                                                                                                                                                             |
| <p><b>Q18</b> What other modifications have you implemented (tick all that apply):</p>                                                           | <p><b>Increased spacing between infusion chairs,</b><br/><b>Increased cleaning in between infusions,</b><br/><b>Reduced number of patients attending to allow social distancing</b><br/>,<br/>OTHER::<br/>we are using the exam rooms because most drs doing telehealth</p> |
| <p><b>Q19</b> What modifications to patient assessment have you made (tick all that apply)</p>                                                   | <p><b>Respondent skipped this question</b></p>                                                                                                                                                                                                                              |
| <p><b>Q20</b> Have you modified the infusion protocols (tick all that apply)</p>                                                                 | <p><b>We have reduced infusion duration for stable patients</b></p>                                                                                                                                                                                                         |
| <p><b>Q21</b> How many patients have cancelled / delayed their infusion due to concern about attending and the risk of coronavirus?</p>          | <p><b>11-20%</b></p>                                                                                                                                                                                                                                                        |

**Q22** If patients have delayed / cancelled their infusions – have any had disease flare **No: all have remained well**

---

**Q23** How many patients that receive biologic infusions for IBD at your centre have tested positive for coronavirus

1

---

**Q24** What sources of information support are there for your patients **We have always had a telephone help line / email address**

---

**Q25** Please list any other modifications you have made to your infusion centre in the text box below

no family/friends allowed to accompany pts

---



#33

COMPLETE

**Collector:** Email Invitation 1 (Email)  
**Started:** Friday, April 17, 2020 11:30:58 AM  
**Last Modified:** Friday, April 17, 2020 11:36:39 AM  
**Time Spent:** 00:05:41  
**Email:** ailsa.hart@nhs.net  
**IP Address:** 2.99.228.184

Page 1: IOIBD Survey following Webinar-4 dd 10 April 2020

**Q1 A. BACKGROUND QUESTIONS (before the coronavirus pandemic)**1. In which country do you practice:

uk

**Q2** About your infusion centre: **The infusion centre is dedicated to patients with IBD**

**Q3** About staffing of your infusion centre (tick all that apply)Our infusion centre is organised as follows: **Has IBD specialist nurse input, but infusions given by general nurses**

**Q4** About the location of your infusion centre (tick all that apply): **Our infusion centre is attached to my practice / unit / hospital**

**Q5** 5) How many infusions for IBD patients does your IBD centre prescribe each week **100-200**

**Q6** What percentage of these infusions are “home infusions” **1-10%**

**Q7** In the infusion unit, which of the following are performed (tick all that apply) **Disease activity / adverse event assessment,  
Routine blood tests,  
Therapeutic drug levels.**

**Q8** Do you reduce the duration of infliximab infusions monitoring for patients who are stable on maintenance therapy **Yes: reduce infusion to 60 minutes**

**Q9** Do you reduce the post infusion monitoring for patient on stable maintenance therapy **Yes: post infusion monitoring is reduced**

**Q10** MODIFICATIONS INTRODUCED IN RESPONSE TO CORONAVIRUS PANDEMIC10) Have you moved the location of your infusion centre: **Yes: it has moved to a new location out of the medical centre in response to coronavirus**

|                                                                                                                                  |                                                                                                                                                                                                                                                    |
|----------------------------------------------------------------------------------------------------------------------------------|----------------------------------------------------------------------------------------------------------------------------------------------------------------------------------------------------------------------------------------------------|
| <b>Q11</b> Has your infusion centre experienced a change its capacity:                                                           | <b>No, the capacity of infusions has remained the same</b>                                                                                                                                                                                         |
| <b>Q12</b> Have you changed the case mix attending the infusion centre (tick all that apply):                                    | <b>No: it remains limited to IBD patients only</b>                                                                                                                                                                                                 |
| <b>Q13</b> Have you changed the staffing of the infusion centre:                                                                 | <b>Yes we now use general nurses / other specialty nurses/other GI nurses to deliver infusions</b>                                                                                                                                                 |
| <b>Q14</b> Are patients called in advance of an infusion to screen them for coronavirus symptoms:                                | <b>YES</b>                                                                                                                                                                                                                                         |
| <b>Q15</b> Are patients screened on arrival at the infusion centre for fever / symptoms of coronavirus:                          | <b>YES</b>                                                                                                                                                                                                                                         |
| <b>Q16</b> How many patients have a positive screen and require their infusion to be rescheduled:                                |                                                                                                                                                                                                                                                    |
| 0                                                                                                                                |                                                                                                                                                                                                                                                    |
| <b>Q17</b> If someone has a fever or “influenza like illness” on screening how long are you delaying their infusions for         |                                                                                                                                                                                                                                                    |
| 14 days                                                                                                                          |                                                                                                                                                                                                                                                    |
| <b>Q18</b> What other modifications have you implemented (tick all that apply):                                                  | <b>Increased spacing between infusion chairs,<br/>Increased cleaning in between infusions,<br/>Reduced number of patients attending to allow social distancing<br/>,<br/>Altered the threshold for IV iron infusions to reduce patient numbers</b> |
| <b>Q19</b> What modifications to patient assessment have you made (tick all that apply)                                          | <b>Respondent skipped this question</b>                                                                                                                                                                                                            |
| <b>Q20</b> Have you modified the infusion protocols (tick all that apply)                                                        | <b>Respondent skipped this question</b>                                                                                                                                                                                                            |
| <b>Q21</b> How many patients have cancelled / delayed their infusion due to concern about attending and the risk of coronavirus? | <b>6-10%</b>                                                                                                                                                                                                                                       |
| <b>Q22</b> If patients have delayed / cancelled their infusions – have any had disease flare                                     | <b>Yes: they had infusion and responded</b>                                                                                                                                                                                                        |

**Q23** How many patients that receive biologic infusions for IBD at your centre have tested positive for coronavirus

Respondent skipped this question

---

**Q24** What sources of information support are there for your patients

We have always had a telephone help line / email address

,

We have produced a patient information sheet in response to coronavirus

---

**Q25** Please list any other modifications you have made to your infusion centre in the text box below

Respondent skipped this question

---

#34

COMPLETE

**Collector:** Email Invitation 1 (Email)  
**Started:** Friday, April 17, 2020 4:48:49 PM  
**Last Modified:** Friday, April 17, 2020 4:53:07 PM  
**Time Spent:** 00:04:18  
**Email:** turnerd@szmc.org.il  
**IP Address:** 188.64.207.142

Page 1: IOIBD Survey following Webinar-4 dd 10 April 2020

**Q1 A. BACKGROUND QUESTIONS (before the coronavirus pandemic)**1. In which country do you practice:

Israel

**Q2** About your infusion centre:

**The infusion centre accepts patients from different specialities**

**Q3** About staffing of your infusion centre (tick all that apply)Our infusion centre is organised as follows:

**Staffed purely by general nurses to deliver infusions,  
Has an attending physician at least 50% of operating hours**

**Q4** About the location of your infusion centre (tick all that apply):

**Our infusion centre is attached to my practice / unit / hospital**

**Q5** 5) How many infusions for IBD patients does your IBD centre prescribe each week

**10-50**

**Q6** What percentage of these infusions are "home infusions"

**0%**

**Q7** In the infusion unit, which of the following are performed (tick all that apply)

**Disease activity / adverse event assessment,  
Routine blood tests,  
Therapeutic drug levels.**

**Q8** Do you reduce the duration of infliximab infusions monitoring for patients who are stable on maintenance therapy

**Yes: reduce to 30 minutes**

**Q9** Do you reduce the post infusion monitoring for patient on stable maintenance therapy

**Yes: post infusion monitoring is reduced**

|                                                                                                                                                               |                                                                               |
|---------------------------------------------------------------------------------------------------------------------------------------------------------------|-------------------------------------------------------------------------------|
| <p><b>Q10</b> MODIFICATIONS INTRODUCED IN RESPONSE TO CORONAVIRUS PANDEMIC10) Have you moved the location of your infusion centre:</p>                        | <p><b>No: it remains attached to my centre / practice / hospital</b></p>      |
| <p><b>Q11</b> Has your infusion centre experienced a change its capacity:</p>                                                                                 | <p><b>No, the capacity of infusions has remained the same</b></p>             |
| <p><b>Q12</b> Have you changed the case mix attending the infusion centre (tick all that apply):</p>                                                          | <p><b>No: it has always received patients from different specialities</b></p> |
| <p><b>Q13</b> Have you changed the staffing of the infusion centre:</p>                                                                                       | <p><b>No</b></p>                                                              |
| <p><b>Q14</b> Are patients called in advance of an infusion to screen them for coronavirus symptoms:</p>                                                      | <p><b>NO</b></p>                                                              |
| <p><b>Q15</b> Are patients screened on arrival at the infusion centre for fever / symptoms of coronavirus:</p>                                                | <p><b>YES</b></p>                                                             |
| <p><b>Q16</b> How many patients have a positive screen and require their infusion to be rescheduled:<br/><br/>3</p>                                           |                                                                               |
| <p><b>Q17</b> If someone has a fever or “influenza like illness” on screening how long are you delaying their infusions for<br/><br/>Until fever subsided</p> |                                                                               |
| <p><b>Q18</b> What other modifications have you implemented (tick all that apply):</p>                                                                        | <p><b>Increased spacing between infusion chairs</b></p>                       |
| <p><b>Q19</b> What modifications to patient assessment have you made (tick all that apply)</p>                                                                | <p><b>Respondent skipped this question</b></p>                                |
| <p><b>Q20</b> Have you modified the infusion protocols (tick all that apply)</p>                                                                              | <p><b>No – the protocols remain the same</b></p>                              |
| <p><b>Q21</b> How many patients have cancelled / delayed their infusion due to concern about attending and the risk of coronavirus?</p>                       | <p><b>&lt;5%</b></p>                                                          |
| <p><b>Q22</b> If patients have delayed / cancelled their infusions – have any had disease flare</p>                                                           | <p><b>Yes: they had infusion and responded</b></p>                            |
| <p><b>Q23</b> How many patients that receive biologic infusions for IBD at your centre have tested positive for coronavirus<br/><br/>2</p>                    |                                                                               |

**Q24** What sources of information support are there for your patients

**We have always had a telephone help line / email address**

,

**We have produced a patient information sheet in response to coronavirus**

---

**Q25** Please list any other modifications you have made to your infusion centre in the text box below

**Respondent skipped this question**

---

#35

COMPLETE

**Collector:** Email Invitation 1 (Email)  
**Started:** Sunday, April 19, 2020 8:45:34 PM  
**Last Modified:** Sunday, April 19, 2020 8:49:29 PM  
**Time Spent:** 00:03:54  
**Email:** bruce.sands@mssm.edu  
**IP Address:** 67.83.153.37

Page 1: IOIBD Survey following Webinar-4 dd 10 April 2020

**Q1 A. BACKGROUND QUESTIONS (before the coronavirus pandemic)**1. In which country do you practice:

United States

**Q2** About your infusion centre: **The infusion centre accepts patients from different specialities**

**Q3** About staffing of your infusion centre (tick all that apply)Our infusion centre is organised as follows: **Staffed purely by general nurses to deliver infusions**

**Q4** About the location of your infusion centre (tick all that apply): **Our infusion centre is attached to my practice / unit / hospital**

**Q5** 5) How many infusions for IBD patients does your IBD centre prescribe each week **50-100**

**Q6** What percentage of these infusions are "home infusions" **11-30%**

**Q7** In the infusion unit, which of the following are performed (tick all that apply) **Routine blood tests,  
Therapeutic drug levels.**

**Q8** Do you reduce the duration of infliximab infusions monitoring for patients who are stable on maintenance therapy **Yes: reduce infusion to 60 minutes**

**Q9** Do you reduce the post infusion monitoring for patient on stable maintenance therapy **No all patients are monitored for standard time after an infusion**

**Q10** MODIFICATIONS INTRODUCED IN RESPONSE TO CORONAVIRUS PANDEMIC10) Have you moved the location of your infusion centre: **No: it remains attached to my centre / practice / hospital**

|                                                                                                                                  |                                                                                                                                                                                                                                                                                                                                                                                  |
|----------------------------------------------------------------------------------------------------------------------------------|----------------------------------------------------------------------------------------------------------------------------------------------------------------------------------------------------------------------------------------------------------------------------------------------------------------------------------------------------------------------------------|
| <b>Q11</b> Has your infusion centre experienced a change its capacity:                                                           | <b>Yes, the capacity for infusions has reduced</b>                                                                                                                                                                                                                                                                                                                               |
| <b>Q12</b> Have you changed the case mix attending the infusion centre (tick all that apply):                                    | <b>No: it has always received patients from different specialities</b>                                                                                                                                                                                                                                                                                                           |
| <b>Q13</b> Have you changed the staffing of the infusion centre:                                                                 | <b>No</b>                                                                                                                                                                                                                                                                                                                                                                        |
| <b>Q14</b> Are patients called in advance of an infusion to screen them for coronavirus symptoms:                                | <b>YES</b>                                                                                                                                                                                                                                                                                                                                                                       |
| <b>Q15</b> Are patients screened on arrival at the infusion centre for fever / symptoms of coronavirus:                          | <b>YES</b>                                                                                                                                                                                                                                                                                                                                                                       |
| <b>Q16</b> How many patients have a positive screen and require their infusion to be rescheduled:                                |                                                                                                                                                                                                                                                                                                                                                                                  |
| 0                                                                                                                                |                                                                                                                                                                                                                                                                                                                                                                                  |
| <b>Q17</b> If someone has a fever or “influenza like illness” on screening how long are you delaying their infusions for         |                                                                                                                                                                                                                                                                                                                                                                                  |
| 2 weeks                                                                                                                          |                                                                                                                                                                                                                                                                                                                                                                                  |
| <b>Q18</b> What other modifications have you implemented (tick all that apply):                                                  | <b>Increased spacing between infusion chairs,<br/>Increased cleaning in between infusions,<br/>Reduced number of patients attending to allow social distancing<br/>,<br/>Increased in hours of operation to maintain capacity,<br/>Increased the number of patients receiving home infusions<br/>,<br/>Altered the threshold for IV iron infusions to reduce patient numbers</b> |
| <b>Q19</b> What modifications to patient assessment have you made (tick all that apply)                                          | <b>Respondent skipped this question</b>                                                                                                                                                                                                                                                                                                                                          |
| <b>Q20</b> Have you modified the infusion protocols (tick all that apply)                                                        | <b>No – the protocols remain the same</b>                                                                                                                                                                                                                                                                                                                                        |
| <b>Q21</b> How many patients have cancelled / delayed their infusion due to concern about attending and the risk of coronavirus? | <b>11-20%</b>                                                                                                                                                                                                                                                                                                                                                                    |



**Q22** If patients have delayed / cancelled their infusions – have any had disease flare **No: all have remained well**

---

**Q23** How many patients that receive biologic infusions for IBD at your centre have tested positive for coronavirus

Unknown

---

**Q24** What sources of information support are there for your patients

**We have always had a telephone help line / email address**

,

**We have produced a patient information sheet in response to coronavirus**

---

**Q25** Please list any other modifications you have made to your infusion centre in the text box below

**Respondent skipped this question**

---

#36

COMPLETE

**Collector:** Email Invitation 1 (Email)  
**Started:** Monday, April 20, 2020 10:16:38 AM  
**Last Modified:** Monday, April 20, 2020 12:04:50 PM  
**Time Spent:** 01:48:11  
**Email:** jonas.halfvarsson@regionorebrolan.se  
**IP Address:** 194.103.185.10

Page 1: IOIBD Survey following Webinar-4 dd 10 April 2020

**Q1 A. BACKGROUND QUESTIONS (before the coronavirus pandemic)1. In which country do you practice:**

Sweden

**Q2 About your infusion centre:** **The infusion centre is dedicated to patients with IBD**

**Q3 About staffing of your infusion centre (tick all that apply)Our infusion centre is organised as follows:** **Staffed purely by IBD specialist nurses,  
Has an attending physician at least 50% of operating hours**

**Q4 About the location of your infusion centre (tick all that apply):** **Our infusion centre is attached to my practice / unit / hospital**

**Q5 5) How many infusions for IBD patients does your IBD centre prescribe each week** **10-50**

**Q6 What percentage of these infusions are "home infusions"** **0%**

**Q7 In the infusion unit, which of the following are performed (tick all that apply)** **Disease activity / adverse event assessment,  
Routine blood tests,  
Therapeutic drug levels.**

**Q8 Do you reduce the duration of infliximab infusions monitoring for patients who are stable on maintenance therapy** **Yes: reduce to 30 minutes**

**Q9 Do you reduce the post infusion monitoring for patient on stable maintenance therapy** **Yes: we do not perform post infusion monitoring for stable patients**

**Q10** MODIFICATIONS INTRODUCED IN RESPONSE TO CORONOVIRUS PANDEMIC10) Have you moved the location of your infusion centre:

**No: it remains attached to my centre / practice / hospital**

**Q11** Has your infusion centre experienced a change its capacity:

**Yes, the capacity for infusions has reduced**

**Q12** Have you changed the case mix attending the infusion centre (tick all that apply):

**No: it remains limited to IBD patients only**

**Q13** Have you changed the staffing of the infusion centre:

**No**

**Q14** Are patients called in advance of an infusion to screen them for coronavirus symptoms:

**NO**

**Q15** Are patients screened on arrival at the infusion centre for fever / symptoms of coronavirus:

**YES**

**Q16** How many patients have a positive screen and require their infusion to be rescheduled:

Patients are instructed to self-screen themselves and call us in advance. Therefore, the great majority of patients who have their infusion rescheduled are picked-up via the self-screen process. We do not keep records on number of patients that have been reschedule. However, based on an estimated guess, only a handful number of patients have been rescheduled via screening at arrival.

**Q17** If someone has a fever or “influenza like illness” on screening how long are you delaying their infusions for

Depends on the clinical picture, including results from possible SARS-CoV-2 PCR test, patients will be follow-up over phone from anything between 2-3 days to 14 days (potentially including re-testing). Some may also be re-scheduled for an infusion and requested to call us if symptoms have not resolved by 48h before the postponed infusion slot

**Q18** What other modifications have you implemented (tick all that apply):

**Increased spacing between infusion chairs,**  
**Reduced number of patients attending to allow social distancing**  
 ,  
**Altered the threshold for IV iron infusions to reduce patient numbers**  
 ,  
 OTHER::  
 Reducing the proportion of patients, who are started on iv maintenance therapies

**Q19** What modifications to patient assessment have you made (tick all that apply)

**Respondent skipped this question**

**Q20** Have you modified the infusion protocols (tick all that apply)

**We have switched iv premedication to oral where possible**

---

**Q21** How many patients have cancelled / delayed their infusion due to concern about attending and the risk of coronavirus?

**6-10%**

---

**Q22** If patients have delayed / cancelled their infusions – have any had disease flare

**Yes: they had infusion and responded**

---

**Q23** How many patients that receive biologic infusions for IBD at your centre have tested positive for coronavirus

We have had shortage of tests in Sweden, and not been able to test patients who have had symptoms indicating COVID-19. Therefore, only one patient has tested positive

---

**Q24** What sources of information support are there for your patients

**We have always had a telephone help line / email address**

---

**Q25** Please list any other modifications you have made to your infusion centre in the text box below

Direct patients to websites whenever possible (instead of printed material)

---
